# Supplementary material
Source: MDPI journal article supplement (https://www.mdpi.com/2072-4292/15/19/4822)
Supplement: s1 [file s1]

**Calvari S., Nunnari G. (2023)**  
**Statistical insights on the eruptive activity at Stromboli volcano (Italy) recorded from 1879 to 2023**  
**Supplementary Material**

**Table S1**

The overall number of events considered in this catalogue consists of 520 records from 1879 to June 2023. Among the 278 explosive events, 196 are classified as major explosions (X), 42 as paroxysmal explosions (XX) and 40 are uncertain major explosions (U), which means that they lie at the boundary between the persistent explosive activity and major explosions. The remaining events have been classified as lava flows, further subdivided on the basis of duration and erupted volume as F (small lava flows lasting less than 1 day, or intra-crater lava flows having volume up to  $10^3 \text{ m}^3$ ), FF (overflows from the crater rim and small lava flows lasting more than 1 day and less than 1 month, having volumes greater than  $10^3 \text{ m}^3$  and less than  $10^6 \text{ m}^3$ ) and FFF (flank eruptions, involving opening of eruptive fissures on the Sciara del Fuoco, duration of 1 month or more, and/or lava volumes greater than  $1 \times 10^6 \text{ m}^3$ ); then Pyroclastic Density Current (PDC), Tsunami (T), Crater Failure (C) and Landslides (L). In the table here below, in white are evidenced the explosive events; in red the effusive events; in green the instability events, either crater failure, landslides or pyroclastic density currents; in yellow tsunami. Time is expressed in UTC, local time (LT) only when specified.

| Year | Month | Day | Type | Time (UTC) | Activity                  | Duration | References |
|------|-------|-----|------|------------|---------------------------|----------|------------|
| 1879 | 2     | 4   | X    |            | Major explosion           |          | [71]       |
| 1879 | 2     | 5   | XX   |            | Paroxysm                  |          | [71]       |
| 1879 | 6     | 8   | XX   |            | Paroxysm                  |          | [71]       |
| 1881 | 10    | 18  | U    |            | Uncertain major explosion |          | [71]       |
| 1882 | 1     | 30  | X    |            | Major explosion           |          | [71]       |
| 1882 | 3     | 13  | U    |            | Uncertain major explosion |          | [71]       |
| 1882 | 4     | 25  | U    |            | Uncertain major explosion |          | [71]       |
| 1882 | 11    | 17  | U    |            | Uncertain major explosion |          | [71]       |
| 1882 | 11    | 17  | FF   |            | Lava flow on SdF          | 13 days  | [55]       |
| 1882 | 11    | 18  | XX   |            | Paroxysm                  |          | [71]       |
| 1882 | 11    | 24  | U    |            | Uncertain major explosion |          | [71]       |
| 1883 | 2     | 8   | U    |            | Uncertain major explosion |          | [71]       |
| 1883 | 2     | 9   | X    |            | Major explosion           |          | [71]       |
| 1883 | 3     | 16  | XX   |            | Paroxysm                  |          | [71]       |
| 1883 | 7     | 3   | U    |            | Uncertain major explosion |          | [71]       |
| 1885 | 6     | 28  | U    |            | Uncertain major explosion |          | [71]       |
| 1886 | 1     | 22  | U    |            | Uncertain major explosion |          | [71]       |
| 1887 | 1     | 31  | XX   |            | Paroxysm                  |          | [71]       |
| 1887 | 3     | 31  | XX   |            | Paroxysm                  |          | [71]       |
| 1887 | 11    | 18  | XX   |            | Paroxysm                  |          | [71]       |
| 1888 | 10    | 23  | X    |            | Major explosion           |          | [71]       |
| 1888 | 11    | 5   | U    |            | Uncertain major explosion |          | [71]       |
| 1888 | 10    | 24  | FFF  |            |                           | 8 months | [23, 55]   |

|      |    |    |     |  |                           |          |          |
|------|----|----|-----|--|---------------------------|----------|----------|
| 1891 | 6  | 24 | XX  |  | Paroxysm                  |          | [55, 71] |
| 1891 | 6  | 30 | X   |  | Major explosion           |          | [71]     |
| 1891 | 6  | 30 | F   |  |                           |          | [55]     |
| 1891 | 7  | 16 | FF  |  |                           | 4 days   | [23, 55] |
| 1891 | 8  | 31 | XX  |  | Paroxysm                  |          | [71]     |
| 1892 | 5  | 11 | U   |  | Uncertain major explosion |          | [71]     |
| 1893 | 1  | 30 | U   |  | Uncertain major explosion |          | [71]     |
| 1893 | 8  | 11 | U   |  | Uncertain major explosion |          | [71]     |
| 1895 | 3  | 29 | X   |  | Major explosion           |          | [71]     |
| 1896 | 7  | 13 | X   |  | Major explosion           |          | [71]     |
| 1897 | 7  | 17 | X   |  | Major explosion           |          | [71]     |
| 1897 | 7  | 18 | U   |  | Uncertain major explosion |          | [71]     |
| 1898 | 8  | 24 | U   |  | Uncertain major explosion |          | [71]     |
| 1898 | 10 | 20 | U   |  | Uncertain major explosion |          | [71]     |
| 1898 | 10 | 25 | X   |  | Major explosion           |          | [71]     |
| 1899 | 11 | 10 | U   |  | Uncertain major explosion |          | [71]     |
| 1900 | 4  | 10 | X   |  | Major explosion           |          | [71]     |
| 1900 | 4  |    | FFF |  |                           | 6 months | [23]     |
| 1900 | 5  | 20 | X   |  | Major explosion           |          | [71]     |
| 1900 | 8  | 4  | X   |  | Major explosion           |          | [71]     |
| 1900 | 8  | 22 | X   |  | Major explosion           |          | [71]     |
| 1900 | 9  | 19 | U   |  | Uncertain major explosion |          | [71]     |
| 1900 | 10 | 19 | X   |  | Major explosion           |          | [71]     |
| 1900 | 10 | 19 | PDC |  | Hot avalanche             |          | [88]     |
| 1901 | 3  | 8  | X   |  | Major explosion           |          | [71]     |
| 1901 | 9  | 22 | X   |  | Major explosion           |          | [71]     |
| 1901 | 12 | 29 | X   |  | Major explosion           |          | [71]     |
| 1903 | 1  | 22 | X   |  | Major explosion           |          | [71]     |
| 1903 | 1  | 1  | FF  |  | Flank eruption            | 9 days   | [23, 55] |
| 1903 | 3  | 3  | F   |  |                           |          | [55]     |
| 1903 | 3  | 9  | X   |  | Major explosion           |          | [71]     |
| 1903 | 6  |    | F   |  |                           |          | [55]     |
| 1903 | 10 |    | F   |  |                           |          | [23]     |
| 1903 | 11 | 11 | U   |  | Uncertain major explosion |          | [71]     |
| 1903 | 11 | 11 | FF  |  |                           | 7 days   | [55]     |
| 1904 | 3  | 19 | X   |  | Major explosion           |          | [71]     |
| 1904 | 8  | 22 | U   |  | Uncertain major explosion |          | [71]     |
| 1905 | 2  | 25 | X   |  | Major explosion           |          | [71]     |
| 1905 | 2  | 25 | F   |  | Lava flow to the sea      | 6 hours  | [23]     |
| 1905 | 3  | 15 | U   |  | Uncertain major explosion |          | [71]     |
| 1905 | 3  | 15 | F   |  |                           |          | [23]     |
| 1905 | 4  | 7  | U   |  | Uncertain major explosion |          | [71]     |

|      |    |    |     |       |                           |           |               |
|------|----|----|-----|-------|---------------------------|-----------|---------------|
| 1905 | 4  | 16 | X   |       | Major explosion           |           | [71]          |
| 1905 | 9  | 27 | U   |       | Uncertain major explosion |           | [71]          |
| 1906 | 1  | 19 | U   |       | Uncertain major explosion |           | [71]          |
| 1906 | 7  | 11 | U   |       | Uncertain major explosion |           | [71]          |
| 1906 | 7  | 15 | XX  |       | Paroxysm                  |           | [71]          |
| 1907 | 1  | 11 | X   |       | Major explosion           |           | [71]          |
| 1907 | 1  | 11 | F   |       | short lava flow           |           | [55]          |
| 1907 | 1  | 27 | FF  |       | Lava flow to the sea      | 4 days    | [23]          |
| 1907 | 1  | 31 | F   |       | short lava flow           |           | [55]          |
| 1907 | 4  | 13 | XX  |       | Paroxysm                  |           | [71]          |
| 1907 | 4  | 27 | XX  |       | Paroxysm                  |           | [71, 55]      |
| 1907 | 5  | 14 | XX  |       | Paroxysm                  |           | [55, 71]      |
| 1907 | 5  | 20 | X   |       | Major explosion           |           | [71]          |
| 1912 | 7  | 27 | XX  |       | Paroxysm                  |           | [71]          |
| 1912 | 8  | 7  | U   |       | Uncertain major explosion |           | [71]          |
| 1912 | 8  | 25 | XX  |       | Paroxysm                  |           | [55]          |
| 1914 | 4  | 18 | FF  |       | Lava flow field           | 3 days    | [138]         |
| 1914 | 5  | 30 | XX  | 20:45 | Paroxysm                  |           | [138]         |
| 1914 | 6  | 18 | F   |       | Lava flow to SdF          |           | [138]         |
| 1914 | 8  | 3  | F   |       |                           |           | [138]         |
| 1914 | 8  | 7  | FF  |       |                           | 3 days    | [138]         |
| 1914 | 8  | 24 | FF  |       |                           | 7 days    | [138]         |
| 1914 | 9  | 1  | FFF |       |                           | 1 month   | [138]         |
| 1914 | 10 | 1  | FFF |       |                           | 1 month   | [138]         |
| 1914 | 11 | 1  | FF  |       |                           | 7 days    | [138]         |
| 1914 | 12 | 10 | FF  |       |                           | 21 days   | [138]         |
| 1915 | 6  | 11 | FFF | 23:40 | Lava flow field to sea    | ~6 months | [23, 55, 138] |
| 1915 | 11 | 13 | XX  | 09:15 | Paroxysm                  |           | [71, 138]     |
| 1915 | 11 | 13 | L   | 13:30 | Landslide                 |           | [88, 138]     |
| 1915 | 11 | 26 | XX  |       | Paroxysm                  |           | [71]          |
| 1915 | 12 | 10 | X   |       | Major explosion           |           | [71]          |
| 1916 | 1  | 5  | X   | 07:37 | Major explosion           |           | [71, 138]     |
| 1916 | 6  | 20 | F   | 23:13 | rheomorphic overflows?    | 1 day     | [138]         |
| 1916 | 7  | 2  | X   | 13:35 | Major explosion           |           | [71, 138]     |
| 1916 | 7  | 3  | F   | 22:30 |                           | 1 day     | [23, 138]     |
| 1916 | 7  | 4  | XX  | 01:00 | Paroxysm                  | 15 min    | [71, 138]     |
| 1916 | 7  | 4  | FFF | 01:00 | Lava flow to the sea      | 2 months  | [23, 138]     |
| 1916 | 7  | 11 | X   | 08:21 | Major explosion           |           | [71, 138]     |
| 1916 | 7  | 22 | X   | 13:28 | Major explosion           |           | [71, 138]     |
| 1916 | 8  | 26 | X   | 06:00 | Major explosion           |           | [71, 138]     |
| 1916 | 10 | 25 | FF  | 21:35 | Lava flow to the sea      | 3 days    | [138]         |
| 1919 | 5  | 22 | XX  |       | Paroxysm                  |           | [55, 71, 145] |
| 1919 | 5  | 22 | T   |       | Tsunami                   |           | [55, 64]      |

|      |    |    |     |                |                                 |          |                |
|------|----|----|-----|----------------|---------------------------------|----------|----------------|
| 1921 | 6  | 4  | X   |                | Major explosion                 |          | [55, 71]       |
| 1921 | 6  | 4  | F   |                | Lava flow after major explosion |          | [55]           |
| 1921 | 6  | 16 | X   |                | Major explosion                 |          | [55, 71]       |
| 1921 | 6  | 16 | F   |                | Lava flow after major explosion |          | [55]           |
| 1921 | 6  | 22 | X   |                | Major explosion                 |          | [55, 71]       |
| 1921 | 6  | 22 | F   |                | Lava flow after major explosion |          | [55]           |
| 1921 | 6  | 27 | XX  |                | Paroxysm                        |          | [71]           |
| 1922 | 8  | 20 | U   |                | Uncertain major explosion       |          | [71]           |
| 1923 | 12 | 15 | U   |                | Uncertain major explosion       |          | [71]           |
| 1929 |    |    | F   |                |                                 |          | [23]           |
| 1930 | 2  | 3  | U   |                | Uncertain major explosion       |          | [71]           |
| 1930 | 2  | 3  | FF  |                |                                 | 3 days   | [23]           |
| 1930 | 9  | 11 | XX  | 09:52          | Paroxysm                        | 30 min   | [55, 71, 128]  |
| 1930 | 9  | 11 | PDC |                | 2 Hot avalanches                |          | [55, 128, 136] |
| 1930 | 9  | 11 | T   | 10:19          | Tsunami                         |          | [55, 128]      |
| 1930 | 9  | 11 | F   |                | Lava flow to the sea            | 12 hours | [23, 128]      |
| 1930 | 10 | 22 | XX  | 18:47          | Paroxysm                        |          | [71, 128]      |
| 1930 | 12 | 1  | F   | 18:00          | Lava flow to the sea            | 1 day    | [23, 55, 128]  |
| 1931 | 4  | 23 | XX  | 21:47+21:55    | Paroxysm                        | 10 min   | [71, 128]      |
| 1931 | 7  | 7  | U   | 12:33          | Uncertain major explosion       |          | [71, 128]      |
| 1932 | 6  | 3  | X   | 13:43          | Major explosion                 |          | [71, 128]      |
| 1934 | 2  | 2  | XX  | 10:10          | Paroxysm                        |          | [71, 129]      |
| 1934 | 8  | 21 | X   | 08:00:00+09:50 | 2 Major explosions              |          | [71, 128]      |
| 1935 | 2  | 22 | X   | 06:25          | Major explosion                 |          | [129]          |
| 1935 | 2  | 23 | X   | 19:40          | Major explosion                 |          | [129]          |
| 1935 | 2  | 24 | X   | 07:15          | 2 Major explosions              |          | [129]          |
| 1935 | 2  | 25 | F   |                | Lava flow to the sea            | 1 day    | [129]          |
| 1935 | 7  | 21 | XX  |                | Paroxysm                        | 20 min   | [129]          |
| 1935 | 7  | 21 | FFF | 13:10          | moderate effusive activity      | 37 days  | [23, 129]      |
| 1936 | 1  | 31 | XX  | 17:50          | Paroxysm                        |          | [71, 129]      |
| 1936 | 1  | 31 | F   | 18:30          | Lava flow to the sea            |          | [129]          |
| 1936 | 5  | 11 | X   | 11:40          | Major explosion                 |          | [71, 129]      |
| 1936 | 5  | 8  | FF  |                | overflows                       | 7 days   | [129]          |
| 1936 | 8  | 22 | X   | 11:55          | Major explosion                 | 10 min   | [71, 129]      |
| 1936 | 9  | 9  | FFF |                | Lava flow field to the sea      | 1 month  | [58, 129]      |
| 1936 | 10 | 3  | F   |                | Lava flow to SdF                |          | [129]          |
| 1936 | 10 | 7  | F   |                | Lava flow to SdF                |          | [129]          |
| 1936 | 10 | 26 | X   | 14:45          | Major explosion                 |          | [71, 129]      |
| 1937 | 1  | 6  | X   | 06:02          | Major explosion                 |          | [71, 130]      |
| 1937 | 1  | 6  | F   | 06:02->        | Lava flow to SdF                | ~1 day   | [130]          |

|      |    |    |     |         |                            |            |           |
|------|----|----|-----|---------|----------------------------|------------|-----------|
| 1937 | 1  | 10 | X   | 06:35   | Major explosion            |            | [130]     |
| 1937 | 1  | 21 | XX  | 13:22   | Paroxysm                   |            | [71, 130] |
| 1937 | 4  | 4  | F   |         | Lava flow to SdF           |            | [130]     |
| 1937 | 6  |    | FF  |         | Lava flows to the sea      |            | [130]     |
| 1937 | 7  | 17 | F   |         | Lava flow to SdF           |            | [130]     |
| 1937 | 7  | 21 | F   |         | Lava flow to SdF           |            | [130]     |
| 1937 | 8  | 25 | F   |         | Lava flows to the sea      | ~1 day     | [130]     |
| 1937 | 8  | 29 | F   |         | Lava flow to SdF           |            | [130]     |
| 1937 | 11 | 14 | XX  | 07:55   | Paroxysm                   |            | [71, 130] |
| 1937 | 11 | 14 | F   |         | Lava flows to the sea      | ~1 day     | [130]     |
| 1938 | 1  | 11 | FF  | 08:40   | Lava flow field to the sea | 16 days    | [23, 130] |
| 1938 | 3  | 26 | F   | 14:40   |                            | ~1 day     | [130]     |
| 1938 | 3  | 31 | F   |         |                            | ~1 day     | [130]     |
| 1938 | 4  | 26 | F   |         |                            | ~1 day     | [130]     |
| 1938 | 5  | 5  | FFF | 07:10   | Lava flow field to the sea | 43 days    | [130]     |
| 1938 | 5  | 8  | X   | 12:16   | Major explosion            |            | [71, 130] |
| 1938 | 5  | 22 | XX  | 17:45   | Paroxysm                   |            | [71, 130] |
| 1938 | 6  | 1  | X   | 07:15   | Major explosion            |            | [71, 130] |
| 1938 | 10 | 19 | F   |         | Lava flow to SdF           |            | [130]     |
| 1938 | 10 | 23 | F   |         | Lava flow to SdF           |            | [130]     |
| 1938 | 10 | 26 | F   |         | Lava flow to SdF           |            | [130]     |
| 1938 | 11 | 5  | FF  |         | Lava flows to the sea      | 7 days     | [130]     |
| 1938 | 12 | 1  | FF  |         | Lava flows to the sea      | 2 days     | [130]     |
| 1938 | 12 | 11 | F   |         | Lava flows to the sea      |            | [130]     |
| 1939 | 1  | 4  | U   | 07:45   | Uncertain major explosion  |            | [71, 130] |
| 1939 | 1  | 10 | F   |         | intracrater lava flows     |            | [130]     |
| 1939 | 2  | 10 | FF  | 16:20   | Lava flows to the sea      | 6 days     | [130]     |
| 1939 | 2  | 12 | U   | 14:35   | Uncertain major explosion  |            | [71, 130] |
| 1939 | 3  | 25 | F   | 20:45   | Lava flows to the sea      | 1 day      | [130]     |
| 1939 | 4  | 9  | F   | 17:45   | Lava flows to the sea      | 1 day      | [130]     |
| 1939 | 4  | 17 | F   | 16:20   | Lava flows to the sea      | 1 day      | [130]     |
| 1939 | 4  | 23 | FF  |         | Lava flow to SdF           | 4 days     | [130]     |
| 1939 | 5  | 2  | FF  |         | Lava flow to SdF           | 4 days     | [130]     |
| 1939 | 5  | 31 | FF  | 19:30   | Lava flows to the sea      | 7 days     | [130]     |
| 1941 | 8  | 22 | XX  | 20:00   | Paroxysm                   |            | [71, 136] |
| 1941 | 8  | 22 | FF  | 20:00-> | 2 lava flows to the sea    | a few days | [136]     |
| 1943 | 12 | 3  | XX  | 13:30   | Paroxysm                   |            | [71, 136] |
| 1943 | 12 | 3  | FFF | 13:30-> | Lava flow field to the sea | ~300 days  | [23, 136] |
| 1944 | 1  | 25 | XX  | 09:44   | Paroxysm                   |            | [71, 136] |
| 1944 | 2  | 24 | U   | 02:30   | Uncertain major explosion  |            | [71, 136] |
| 1944 | 6  | 15 | U   | 10:00   | Uncertain major explosion  |            | [71, 136] |
| 1944 | 8  | 20 | XX  | 07:30   | Paroxysm                   |            | [71, 136] |
| 1944 | 8  | 20 | PDC |         | Hot avalanche to Forgia    |            | [136]     |

|                            |    |    |     |               |                               |          |               |
|----------------------------|----|----|-----|---------------|-------------------------------|----------|---------------|
|                            |    |    |     |               | Vecchia and over the sea      |          |               |
| 1944                       | 8  | 20 | T   |               | Tsunami                       |          | [136]         |
| 1944                       | 8  | 20 | FFF | 07:30->       | Lava flow to SdF              | 2 months | [55, 136]     |
| 1944                       | 9  | 12 | X   | 14:15         | Major explosion               |          | [71, 136]     |
| 1949                       | 6  | 6  | FF  |               | Lava flow to SdF              | 3 days   | [23, 136]     |
| 1950                       | 10 | 20 | X   | 11:10         | Major explosion               |          | [71, 136]     |
| 1950                       | 10 | 20 | FF  | 11:10->       | Overflow                      | 3 days   | [136]         |
| 1952                       | 6  | 7  | U   | 05:00         | Uncertain major explosion     |          | [71, 136]     |
| 1952                       | 6  | 7  | FF  | 05:00->       | intermitted lava flows        | 15 days  | [23, 136]     |
| 1954                       | 2  | 1  | U   | 12:15         | Uncertain major explosion     |          | [71, 139]     |
| 1954                       | 2  | 1  | FFF | 12:15-13:00-> | Lava flow field to the sea    | 40 days  | [23, 138–139] |
| 1954                       | 12 | 6  | F   | 5:10->        | Lava flow to the sea          | 1.5 day  | [138]         |
| 1955                       | 2  | 28 | FF  |               | submarine lava at base of SdF | 22 days  | [23, 121]     |
| 1955                       | 3  | 22 | F   |               | Lava flow to the sea          |          | [121, 137]    |
| 1956                       | 1  | 1  | FF  | 18:00->       | Lava flow to the sea          | 13 days  | [23, 135]     |
| 1956                       | 1  | 16 | FFF |               | Overflows to SdF              | 2 months | [135]         |
| 1958                       | 2  | 6  | FF  | 06:00->       | Lava flow to sea-SW           | 6 days   | [58, 121]     |
| 1958                       | 5  | 31 | FF  | 18:00:00->    | Lava flow to sea-NE           | 5 days   | [121]         |
| 1959                       | 5  | 19 | XX  | 08:00         | Paroxysm                      |          | [71, 121]     |
| 1959                       | 7  | 11 | XX  | 18:20         | Paroxysm                      |          | [71, 121]     |
| 1959                       | 8  | 12 | F   |               | Lava flow to the sea          | 1 day    | [121]         |
| 1959                       | 9  | 6  | X   | 23:30         | Major explosion               |          | [71, 121]     |
| 1959                       | 9  | 7  | FF  |               | Lava flow to SdF              | 3 days   | [121]         |
| 1959                       | 9  | 14 | U   | 09:30         | Uncertain major explosion     |          | [71, 121]     |
| 9-12 April 1966            |    |    | FF  |               | Flank eruption                | 3 days   | [23]          |
| 19 April to 13 August 1967 |    |    | FFF | 05:00         | Lava flow field to the sea    | 116 days | [23, 143]     |
| 31 March to 1 April 1971   |    |    | FF  |               | Flank eruption                | 1 day    | [23]          |
| 1971                       | 5  | 1  | X   | 13:45         | Major explosion               |          | [79]          |
| 1971                       | 5  | 1  | FF  | 13:45->       | Lava flow along SdF           | 3 days   | [79]          |
| 1972                       | 12 | 5  | X   |               | Major explosion               |          | [23, 72]      |
| 1972                       | 12 | 10 | X   |               | Major explosion               |          | [23, 72]      |
| 1973                       | 5  | 10 | X   |               | Major explosion               |          | [23, 80]      |
| 1974                       | 9  | 19 | X   | 00:10         | 2 Major explosions            |          | [54, 80]      |
| 1975                       | 11 | 4  | U   |               | Uncertain major explosion     |          | [23, 72]      |
| 1975                       | 11 | 5  | X   |               | Major explosion               |          | [72]          |
| 5-24 Nov 1975              |    |    | FF  | 15:00->       | Flank eruption                | 19 days  | [54]          |
| 1985                       | 6  | 27 | X   |               | Major explosion               |          | [84]          |
| 1985                       | 12 | 6  | XX  | 08:00         | Paroxysm                      |          | [23, 56, 72]  |
| 1985                       | 12 | 6  | PDC | 08:10         | hot avalanche to the sea      |          | [56, 148]     |
| 6 Dec 1985 to 25 April     |    |    | FFF | 08:00->       | Flank eruption                | 141 days | [56]          |

|      |    |    |    |                   |                      |         |                   |
|------|----|----|----|-------------------|----------------------|---------|-------------------|
| 1986 |    |    |    |                   |                      |         |                   |
| 1986 | 4  | 23 | X  |                   | Major explosion      |         | [84]              |
| 1988 | 8  | 30 | X  | 01:12             | Major explosion      |         | [23, 72, 84, 146] |
| 1989 | 3  | 7  | X  | 00:51             | Major explosion      |         | [81, 84]          |
| 1989 | 3  | 20 | X  | 02:22             | Major explosion      |         | [81, 84]          |
| 1989 | 3  | 26 | X  | 07:27             | Major explosion      |         | [81, 84]          |
| 1989 | 4  | 3  | X  | 18:23             | Major explosion      |         | [81, 84]          |
| 1990 | 4  | 15 | X  |                   | Major explosion      |         | [23, 72]          |
| 1990 | 6  | 18 | X  |                   | Major explosion      |         | [23, 39, 72, 84]  |
| 1990 | 10 | 4  | F  |                   | overflow             |         | [84, 86]          |
| 1992 | 7  | 20 | X  | 01:13             | Major explosion      | 3 min   | [82–84]           |
| 1992 | 9  | 1  | X  | 05:00? (07:00 LT) | Major explosion      |         | [83]              |
| 1992 | 11 | 22 | C  |                   | crater area collapse |         | [86]              |
| 1993 | 2  | 10 | X  |                   | Major explosion      |         | [39, 72, 84]      |
| 1993 | 5  | 16 | F  |                   | overflow             | 1 day   | [58, 84]          |
| 1993 | 5  | 18 | FF |                   | overflow             | 10 days | [58, 132–133]     |
| 1993 | 10 | 16 | X  | 16:10             | Major explosion      | 8 min   | [39, 72, 84, 142] |
| 1993 | 10 | 23 | X  |                   | Major explosion      |         | [132–133]         |
| 1993 | 10 | 30 | X  |                   | Major explosion      |         | [84]              |
| 1993 | 11 | 4  | X  |                   | Major explosion      |         | [84]              |
| 1994 | 6  | 4  | X  |                   | Major explosion      |         | [84]              |
| 1994 |    |    | F  |                   | overflow             |         | [84]              |
| 1995 | 3  | 5  | X  | 18:43             | Major explosion      |         | [39, 72]          |
| 1995 | 5  | 10 | X  | 22:41             | Major explosion      |         | [84, 141]         |
| 1996 | 2  | 16 | X  |                   | Major explosion      |         | [39, 72, 84]      |
| 1996 | 6  | 1  | X  | 23:55 LT          | Major explosion      |         | [39, 72, 84]      |
| 1996 | 6  | 6  | X  |                   | Major explosion      |         | [39, 72, 84]      |
| 1996 | 8  | 16 | F  |                   | small lava flow      | 1 day   | [85]              |
| 1996 | 9  | 4  | X  | 13:44             | Major explosion      | 2.3 min | [39, 72, 84]      |
| 1998 | 1  | 16 | X  |                   | Major explosion      |         | [39, 72]          |
| 1998 | 8  | 23 | X  | 15:26             | Major explosion      | 6       | [39, 72, 84]      |
| 1998 | 9  | 8  | X  | 17:13             | Major explosion      | 11      | [39, 72, 84]      |
| 1998 | 9  | 18 | X  |                   | Major explosion      |         | [84]              |
| 1998 | 11 | 24 | X  | 17:00             | Major explosion      | 15      | [39, 72, 84]      |
| 1998 | 12 | 26 | X  | 14:55             | Major explosion      | 9       | [39, 72]          |
| 1998 | 12 | 28 | X  | 01:42             | Major explosion      | 18      | [39, 72]          |
| 1999 | 3  | 13 | X  | 06:22             | Major explosion      | 12      | [84]              |
| 1999 | 4  | 9  | X  |                   | Major explosion      |         | [85]              |
| 1999 | 8  | 25 | X  | 22:56             | Major explosion      | 10      | [84]              |
| 1999 | 10 | 10 | X  |                   | Major explosion      |         | [85]              |
| 1999 | 11 | 16 | X  |                   | Major explosion      |         | [84]              |
| 1999 | 12 | 22 | X  | 15:30             | Major explosion      | 6       | [84]              |
| 2000 | 7  | 4  | X  |                   | Major explosion      |         | [85]              |



|                             |    |    |     |             |                           |                 |                  |
|-----------------------------|----|----|-----|-------------|---------------------------|-----------------|------------------|
| 2000                        | 8  | 2  | L   |             | Landslide on SdF          |                 | [85]             |
| 2000                        | 9  | 6  | X   |             | Major explosion           |                 | [85]             |
| 2001                        | 10 | 20 | X   | 00:33       | Major explosion           |                 | [39, 72]         |
| 2002                        | 1  | 23 | X   | 20:54       | Major explosion           |                 | [39, 72]         |
| 2002                        | 7  | 24 | X   |             | Major explosion           |                 | [39, 72]         |
| 2002                        | 11 | 15 | F   |             | Overflow from CC          |                 | [131]            |
| 2002                        | 12 | 28 | L   |             | Landslide                 |                 | [44, 87]         |
| 2002                        | 12 | 28 | T   |             | Tsunami                   |                 | [44, 87]         |
| 28 Dec 2002 to 22 July 2003 |    |    | FFF |             | Flank eruption            | 7 months        | [44]             |
| 2003                        | 3  | 17 | U   | 05:26+14:36 | Uncertain Major explosion |                 | [152]            |
| 2003                        | 4  | 3  | X   | 09:21       | Major explosion           |                 | [44, 153]        |
| 2003                        | 4  | 5  | XX  | 07:13       | Paroxysm                  |                 | [150]            |
| 2003                        | 4  | 10 | X   | 00:15       | Major explosion           |                 | [44, 154]        |
| 2004                        | 9  | 16 | X   | 04:07       | Major explosion           |                 | [24]             |
| 2004                        | 11 | 24 | X   | 19:49       | Major explosion           |                 | [24]             |
| 2004                        | 12 | 7  | X   | 10:08       | Major explosion           | poor visibility | [24]             |
| 2004                        | 12 | 9  | X   | 10:02       | Major explosion           |                 | [24]             |
| 2005                        | 1  | 9  | X   | 10:32       | Major explosion           |                 | [24, 145]        |
| 2005                        | 3  | 23 | X   | 22:32       | Major explosion           |                 | [24]             |
| 2005                        | 4  | 9  | X   | 14:41       | Major explosion           |                 | [24]             |
| 2005                        | 5  | 9  | X   | 10:37       | Major explosion           | 4               | [24, 151]        |
| 2005                        | 5  | 12 | X   | 19:26       | Major explosion           | 3               | [24, 151]        |
| 2005                        | 6  | 23 | X   | 12:38       | Major explosion           |                 | [155]            |
| 2005                        | 6  | 30 | X   | 04:43+15:55 | Major explosions          |                 | [24, 151]        |
| 2005                        | 8  | 5  | X   | 11:08       | Major explosion           |                 | [39, 72]         |
| 2005                        | 11 | 12 | X   | 06:24?      | Major explosion           |                 | [24]             |
| 2006                        | 5  | 22 | X   | 22:38       | Major explosion           |                 | [24]             |
| 2006                        | 6  | 16 | X   | 19:07       | Major explosion           |                 | [24]             |
| 2006                        | 12 | 15 | X   | 12:29       | Major explosion           | 40 secs         | [39, 72, 156]    |
| 27 Febr - 2 April 2007      |    |    | FFF |             | Flank eruption            | 34 days         | [57]             |
| 2007                        | 3  | 15 | XX  | 20:38       | Paroxysm                  |                 | [39, 48, 72]     |
| 2008                        | 2  | 29 | X   | 02:17       | Major explosion           |                 | [39, 72, 91]     |
| 2008                        | 7  | 9  | X   | 05:35+05:40 | Major explosion           |                 | [91]             |
| 2008                        | 8  | 7  | X   | 14:21       | Major explosion           |                 | [157]            |
| 2008                        | 9  | 7  | X   | 07:40       | Major explosion           |                 | [31, 39, 72, 91] |
| 2008                        | 9  | 13 | F   | 00:00-07:00 | Lava flow                 | 7 h             | [91]             |
| 2008                        | 11 | 16 | F   | 13:46       | intracrater flow          |                 | [91]             |
| 2008                        | 12 | 6  | X   | 20:49       | Major explosion           |                 | [39, 72, 91]     |
| 2008                        | 12 | 17 | X   | 13:32       | Major explosion           |                 | [91]             |
| 2008                        | 12 | 31 | X   | 22:47       | Major explosion           |                 | [158]            |
| 2009                        | 1  | 3  | X   | 21:21       | Major explosion           |                 | [91]             |
| 2009                        | 3  | 29 | F   | 02:41->     | overflow                  | pulses          | [91]             |



|      |    |    |    |              |                              |           |                    |
|------|----|----|----|--------------|------------------------------|-----------|--------------------|
| 2009 | 4  | 22 | FF | 12:00->      | intracrater flow             | 3 days    | [91]               |
| 2009 | 5  | 3  | X  | 14:58        | Major explosion              |           | [39, 72, 91]       |
| 2009 | 5  | 3  | FF | 17:00->      | intracrater flow             | 2 days    | [91]               |
| 2009 | 5  | 17 | F  | 16:15->18:00 | small flow                   | 1 day     | [91]               |
| 2009 | 8  | 30 | F  | 11:00->21:00 | 2 small flows                | 10 h      | [91]               |
| 2009 | 11 | 8  | X  | 12:29        | Major explosion              |           | [39, 72, 91]       |
| 2009 | 11 | 8  | F  | 12:29->      | intracrater flow             | 1 day     | [25, 91]           |
| 2009 | 11 | 24 | X  | 11:20        | Major explosion              |           | [39, 72, 91]       |
| 2010 | 1  | 4  | X  | 19:12        | Major explosion              |           | [159]              |
| 2010 | 1  | 7  | F  | 12:54->      | intracrater flow             | 1 day     | [91]               |
| 2010 | 1  | 10 | X  | 14:48        | Major explosion              |           | [39, 72]           |
| 2010 | 1  | 10 | F  | 14:48->      | overflow                     |           | [91]               |
| 2010 | 1  | 14 | X  | 09:18        | Major explosion              |           | [160]              |
| 2010 | 1  | 21 | X  | 20:45        | Major explosion              |           | [39, 72, 91]       |
| 2010 | 3  | 12 | X  | 07:57        | Major explosion              | 10 min    | [144, 161]         |
| 2010 | 6  | 25 | X  | 06:02        | Major explosion              |           | [91]               |
| 2010 | 6  | 30 | X  | 16:33        | Major explosion              |           | [39, 72, 91]       |
| 2010 | 7  | 11 | X  | 19:46        | Major explosion              | 2 pulses  | [162]              |
| 2010 | 10 | 19 | FF |              | intracrater flow             | 7 days    | [91]               |
| 2010 | 11 | 1  | F  | 14:00->      | intracrater flow             |           | [163]              |
| 2010 | 12 | 10 | X  | 14:37        | Major explosion              |           | [91]               |
| 2010 | 12 | 12 | F  | 02:00        | rheomorphic intracrater flow | 4 hours   | [91, 164]          |
| 2010 | 12 | 19 | X  | 09:56        | Major explosion              |           | [91]               |
| 2011 | 1  | 26 | F  | 19:00->05:45 | intracrater flows            | ~11 hours | [91]               |
| 2011 | 3  | 4  | X  | 12:25        | Major explosion              |           | [91]               |
| 2011 | 4  | 8  | F  | 16:15->00:00 | intracrater flow             | 8 hours   | [151]              |
| 2011 | 6  | 20 | X  | 05:19        | Major explosion              |           | [91]               |
| 2011 | 7  | 5  | X  | 02:45        | Major explosion              |           | [39, 72, 91]       |
| 2011 | 7  | 10 | X  | 15:21        | Major explosion              |           | [39, 72, 91]       |
| 2011 | 7  | 17 | X  | 20:45        | Major explosion              |           | [39, 72, 91]       |
| 2011 | 7  | 29 | F  | 00:09-06:45  | intracrater flow             | 6.5 hours | [165]              |
| 2011 | 8  | 1  | F  | 21:00->13:00 | Lava flow to SdF             | 16 hours  | [134, 166]         |
| 2011 | 8  | 5  | X  | 07:14        | Major explosion              |           | [39, 72, 134, 166] |
| 2011 | 8  | 5  | F  | 07:00        | overflow                     | 2 hours   | [91]               |
| 2011 | 8  | 9  | FF | 7:27->       | intracrater flow             | 3 days    | [91]               |
| 2011 | 8  | 15 | X  | 19:33        | Major explosion              |           | [91]               |
| 2011 | 8  | 16 | FF | 12:40->      | overflow                     | 3 days    | [91]               |
| 2011 | 8  | 20 | F  | 01:30        | intracrater flow             | 8.5 hours | [91]               |
| 2011 | 8  | 26 | F  | 01:00        | intracrater flow             | 2.5 hours | [91]               |
| 2011 | 8  | 30 | X  | 05:06        | Major explosion              |           | [91]               |
| 2011 | 8  | 30 | F  | 15:15->23:00 | intracrater flows            | 8 hours   | [91]               |
| 2011 | 9  | 5  | X  | 03:52        | Major explosion              |           | [91]               |

|      |    |    |     |                    |                                      |           |          |
|------|----|----|-----|--------------------|--------------------------------------|-----------|----------|
| 2011 | 9  | 6  | F   | 18:50->            | intracrater flows                    | 1 hour    | [91]     |
| 2012 | 2  | 15 | X   | 22:08              | Major explosion                      |           | [91]     |
| 2012 | 2  | 15 | PDC |                    | 5 pulses+abundant fallout on the SdF |           | [167]    |
| 2012 | 2  | 16 | X   | 04:17              | Major explosion                      |           | [91]     |
| 2012 | 3  | 6  | X   | 06:43              | Major explosion                      |           | [72, 91] |
| 2012 | 7  | 5  | F   | 20:15->            | rheomorphic flow from spattering     | 2 hours   | [91]     |
| 2012 | 7  | 7  | F   | 23:00->            | rheomorphic flow from spattering     | 1 hour    | [91]     |
| 2012 | 7  | 10 | X   | 04:00              | Major explosion                      |           | [91]     |
| 2012 | 7  | 26 | X   | 18:31              | Major explosion                      |           | [91]     |
| 2012 | 7  | 26 | PDC |                    | PDC on the SdF                       |           | [151]    |
| 2012 | 8  | 6  | F   | 12:01->            | intracrater flows                    |           | [91]     |
| 2012 | 11 | 22 | X   | 13:17              | Major explosion                      |           | [91]     |
| 2012 | 11 | 22 | X   | 20:57              | Major explosion                      |           | [91]     |
| 2012 | 12 | 18 | F   | 12:50->            | overflow                             | 7 hours   | [91]     |
| 2012 | 12 | 23 | F   | 07:25->            | overflow                             |           | [91]     |
| 2012 | 12 | 25 | FF  |                    | overflow                             | 2 days    | [91]     |
| 2013 | 1  | 7  | F   | 2:00->             | overflow                             | 17 hours  | [69]     |
| 2013 | 1  | 9  | F   | 16:25->00:00       | overflow from N1                     | 7.5 hours | [168]    |
| 2013 | 1  | 10 | F   | 00:30->            | overflow                             |           | [168]    |
| 2013 | 1  | 11 | FF  | 06:30->            | overflow from NEC                    | 2 days    | [168]    |
| 2013 | 1  | 12 | FF  | 00:00              | overflow from NEC                    | 2 days    | [168]    |
| 2013 | 1  | 12 | X   | 11:12              | Major explosion                      |           | [69]     |
| 2013 | 1  | 12 | C   | 11:00              | Crater wall collapse+PDC             |           | [69]     |
| 2013 | 1  | 12 | PDC | 11:00              | Crater wall collapse+PDC             |           | [69]     |
| 2013 | 1  | 13 | FF  | 20:00->            | overflows                            | 3 days    | [69]     |
| 2013 | 2  | 7  | X   | 20:47              | Major explosion                      |           | [69]     |
| 2013 | 2  | 8  | F   | 10:59:00->         | overflow                             | 5 hours   | [169]    |
| 2013 | 2  | 8  | FF  | 22:21->            | overflow                             | 2 days    | [169]    |
| 2013 | 2  | 11 | F   | 07:30->            | overflow                             | 1 day     | [169]    |
| 2013 | 3  | 1  | F   | 21:45              | overflow                             | 1 day     | [69]     |
| 2013 | 4  | 13 | F   | 12:55              | overflow along SdF                   | 3.5 hours | [170]    |
| 2013 | 4  | 15 | X   | 08:40              | Major explosion                      |           | [69]     |
| 2013 | 4  | 15 | PDC | 08:40              | PDC                                  |           | [69]     |
| 2013 | 4  | 17 | FF  | 14:17              | overflow along SdF                   | 2 days    | [171]    |
| 2013 | 4  | 21 | F   | 17:40              | overflow along SdF                   | 4 hours   | [171]    |
| 2013 | 4  | 26 | F   | 22:45              | overflow along SdF                   | ~12 hours | [172]    |
| 2013 | 4  | 28 | F   | 16:05              | overflow along SdF                   | 12 hours  | [172]    |
| 2013 | 5  | 1  | F   | 02:24->            | overflow                             | 1 day     | [173]    |
| 2013 | 5  | 3  | L   | 8:30, 13:16, 21:19 | Landslides                           |           | [173]    |
| 2013 | 5  | 7  | FF  | 21:25              | overflow                             | 3 days    | [174]    |

|                    |    |    |     |                                   |                                |          |            |
|--------------------|----|----|-----|-----------------------------------|--------------------------------|----------|------------|
| 2013               | 12 | 4  | X   | 23:48                             | Major explosion                | 2        | [72]       |
| 2013               | 12 | 14 | X   | 17:06                             | Major explosion                |          | [175, 176] |
| 2013               | 12 | 25 | U   |                                   | Uncertain major explosion      |          | [72]       |
| 2014               | 1  | 4  | X   | 23:06                             | Major explosion                |          | [72]       |
| 2014               | 6  | 17 | F   | 06:26->                           | intracrater                    | 70 min   | [177]      |
| 2014               | 6  | 22 | F   | 13:00->                           | overflow along SdF             | 1 day    | [177]      |
| 2014               | 6  | 29 | F   | 9:49->                            | intracrater                    | 1 day    | [178]      |
| 2014               | 7  | 1  | L   | 7:24, 8:25                        | Landslides                     |          | [179]      |
| 2014               | 7  | 1  | F   | 00:06-03:30                       | intracrater+overflow along SdF | 3 hours  | [179]      |
| 2014               | 7  | 4  | F   | 2:48-18:00                        | intracrater 2 flows            | 15 hours | [179]      |
| 2014               | 7  | 7  | C   | 05:20                             | Crater wall collapse+PDC       |          | [179]      |
| 2014               | 7  | 7  | PDC | 05:20                             | Crater wall collapse+PDC       |          | [179]      |
| 2014               | 7  | 7  | F   | 05:32->                           | overflow on SdF                | 11 hours | [179]      |
| 2014               | 7  | 9  | F   | 14:18->                           | overflow on SdF                | 1 day    | [180]      |
| 2014               | 7  | 13 | F   | 6:19-12:00                        | overflow on SdF                | 6 hours  | [181]      |
| 2014               | 7  | 15 | F   | 07:45:00->                        | overflow on SdF                | 7 hours  | [181]      |
| 2014               | 7  | 16 | F   | 22:52->                           | overflow on SdF                | 4 hours  | [181]      |
| 2014               | 7  | 17 | F   | 16:20:00->                        | overflow on SdF                | 4 hours  | [181]      |
| 2014               | 7  | 19 | FF  | 02:30->                           | overflow on SdF to coast       | 2 days   | [181]      |
| 2014               | 8  | 6  | FF  | 12:29->                           | overflow on SdF                |          | [53]       |
| 2014               | 8  | 6  | L   | 14:02, 14:19, 14:29, 15:05, 16:01 | Landslides+PDC                 |          | [53]       |
| 2014               | 8  | 6  | PDC | 14:02, 14:19, 14:29, 15:05, 16:01 | Landslides+PDC                 |          | [53]       |
| 2014               | 8  | 7  | C   | 03:40                             | Crater wall collapse+PDC       |          | [53]       |
| 2014               | 8  | 7  | PDC | 03:40                             | Crater wall collapse+PDC       |          | [53]       |
| 7 Aug - 2 Nov 2014 |    |    | FFF |                                   | Flank eruption                 | 3 months | [53]       |
| 2014               | 10 | 18 | X   | 17:30                             | Major explosion                |          | [151]      |
| 2014               | 10 | 23 | X   | 04:29                             | Major explosion                |          | [151]      |
| 2015               | 2  | 15 | X   | 11:09                             | Major explosion                |          | [72]       |
| 2015               | 7  | 16 | X   | 01:03                             | Major explosion                |          | [72]       |
| 2015               | 11 | 8  | X   | 20:53                             | Major explosion                |          | [182]      |
| 2016               | 7  | 23 | X   | 12:25                             | Major explosion                |          | [151]      |
| 2017               | 7  | 26 | X   | 17:57                             | Major explosion                |          | [72, 183]  |
| 2017               | 10 | 23 | X   | 14:04                             | Major explosion                |          | [72, 184]  |
| 2017               | 11 | 1  | X   | 08:29                             | Major explosion                |          | [72, 185]  |
| 2017               | 12 | 1  | X   | 12:42                             | Major explosion                |          | [72, 186]  |
| 2017               | 12 | 15 | F   | 13:25:00->                        | overflow                       | 3 hours  | [187]      |
| 2018               | 3  | 7  | X   | 12:48                             | Major explosion                |          | [72, 188]  |
| 2018               | 3  | 7  | PDC |                                   | PDC along the SdF              |          | [188]      |
| 2018               | 3  | 18 | X   | 19:27                             | Major explosion                |          | [72, 189]  |
| 2018               | 3  | 18 | PDC |                                   | PDC along the SdF              |          | [189]      |

|                       |    |    |     |                |                            |         |           |
|-----------------------|----|----|-----|----------------|----------------------------|---------|-----------|
| 2018                  | 4  | 24 | X   | 09:05          | Major explosion            | 9 min   | [72, 190] |
| 2018                  | 4  | 26 | X   | 22:53          | Major explosion            |         | [72]      |
| 2018                  | 4  | 26 | PDC |                | PDC along the SdF          |         | [190]     |
| 2018                  | 8  | 18 | X   | 15:08          | Major explosion            |         | [72]      |
| 2018                  | 8  | 18 | PDC |                | PDC to the coast           |         | [191]     |
| 2018                  | 12 | 6  | F   | 15:20          | Overflow/lava flow         | 40 min  | [192]     |
| 2019                  | 6  | 25 | X   | 23:03          | Major explosion            |         | [32, 72]  |
| 2019                  | 7  | 3  | F   | 14:43          | intracrater flow           | 2 min   | [151]     |
| 2019                  | 7  | 3  | XX  | 14:45          | Paroxysm                   |         | [32, 72]  |
| 2019                  | 7  | 3  | PDC | 14:45          | 2 PDC along the SdF        |         | [50]      |
| 2019                  | 7  | 3  | T   |                | Small tsunami              |         | [50]      |
| 3 July-30 August 2019 |    |    | FFF | 14:46          | Lava flow field to the sea | 58 days | [50]      |
| 2019                  | 7  | 13 | X   | 20:33          | Major explosion            |         | [32]      |
| 2019                  | 7  | 15 | X   | 19:09          | Major explosion            |         | [32]      |
| 2019                  | 8  | 28 | XX  | 10:17          | Paroxysm                   |         | [32, 72]  |
| 2019                  | 8  | 28 | PDC | 10:17          | 2 PDC along the SdF        |         | [50]      |
| 2019                  | 8  | 28 | T   |                | Small tsunami              |         | [50]      |
| 2019                  | 8  | 29 | X   | 20:43+21:29    | Major explosions           |         | [32, 72]  |
| 2020                  | 3  | 28 | F   | 16:56          | Overflow to the sea        | 4 hours | [193]     |
| 2020                  | 3  | 30 | FF  | 23:30          | Overflow to the sea        | 2 days  | [194]     |
| 2020                  | 7  | 19 | XX  | 03:03          | Paroxysm                   |         | [32]      |
| 2020                  | 8  | 13 | X   | 14:50          | Major explosion            |         | [32]      |
| 2020                  | 11 | 10 | X   | 20:04          | Major explosion            |         | [32]      |
| 2020                  | 11 | 16 | X   | 09:17          | Major explosion            |         | [32]      |
| 2020                  | 11 | 16 | PDC | 09:17          | N flank blown out + PDC    |         | [32]      |
| 2020                  | 11 | 21 | X   | 00:33          | Major explosion            |         | [32]      |
| 2020                  | 12 | 6  | X   | 05:12          | Major explosion            |         | [32]      |
| 2021                  | 1  | 18 | F   | 10:11+15:00    | overflows                  | 9 hours | [33]      |
| 2021                  | 1  | 22 | F   | 11:22          | overflow                   | 9 hours | [33]      |
| 2021                  | 1  | 24 | X   | 15:15          | Major explosion            |         | [195]     |
| 2021                  | 1  | 24 | F   | 18:56->        | overflow                   | 17 h    | [33]      |
| 2021                  | 3  | 1  | X   | 01:33          | Major explosion            |         | [33]      |
| 2021                  | 5  | 19 | C   | 12:45          | NE Crater failure+PDCs     |         | [33]      |
| 2021                  | 5  | 19 | PDC | 12:45          | NE Crater failure+PDCs     |         | [33]      |
| 19-24 May 2021        |    |    | FF  |                | Lava flows                 | 5 days  | [33]      |
| 2021                  | 6  | 11 | F   |                | Lava flows                 |         | [33]      |
| 2021                  | 6  | 13 | F   |                | Lava flows                 |         | [33]      |
| 2021                  | 6  | 16 | C   | 13:28:00+16:46 | NE Crater failure+PDCs     |         | [33]      |
| 2021                  | 6  | 16 | PDC | 13:28:00+16:46 | NE Crater failure+PDCs     |         | [33]      |
| 2021                  | 6  | 17 | F   |                | Lava flows                 |         | [33]      |
| 2021                  | 6  | 19 | F   |                | Lava flows                 |         | [33]      |
| 2021                  | 6  | 21 | F   |                | Lava flows                 | 4 h     | [33]      |
| 2021                  | 6  | 23 | F   |                | Lava flows                 |         | [33]      |

|      |    |    |     |                   |                         |         |                |
|------|----|----|-----|-------------------|-------------------------|---------|----------------|
| 2021 | 6  | 25 | F   |                   | Lava flows              |         | [33]           |
| 2021 | 7  | 14 | X   | 13:19             | Major explosion         |         | [196]          |
| 2021 | 7  | 28 | X   | 14:47             | Major explosion         |         | [197]          |
| 2021 | 8  | 1  | X   | 20:01             | Major explosion         |         | [197]          |
| 2021 | 9  | 11 | X   | 19:09             | Major explosion         |         | [198]          |
| 2021 | 10 | 6  | X   | 14:17             | Major explosion         |         | [199]          |
| 2021 | 10 | 25 | L   | 00:00             | Landslides              | 3 min   | [200]          |
| 2021 | 11 | 25 | FF  |                   | overflow                | 2 days  | [201]          |
| 2022 | 5  | 13 | X   | 14:43             | Major explosion         |         | [202]          |
| 2022 | 5  | 25 | X   | 14:11             | Major explosion         |         | [203]          |
| 2022 | 6  | 6  | L   | 20:21+20:29       | Landslides              |         | [204]          |
| 2022 | 7  | 25 | X   | 02:56             | Major explosion         | 8 min   | [205–206]      |
| 2022 | 7  | 25 | C   | 02:56             | NEC blowing by ME       |         | [206]          |
| 2022 | 7  | 25 | PDC | 02:56             | PDC on Sdf+sea          |         | [206]          |
| 2022 | 7  | 27 | F   | 17:08             | Lava flow               | 3 h     | [206–207]      |
| 2022 | 9  | 25 | X   | 02:29             | Major explosion         |         | [206, 208]     |
| 2022 | 9  | 25 | F   | 02:30->06:00      | overflow                | 3.5 h   | [208]          |
| 2022 | 9  | 29 | X   | 13:25             | Major explosion         |         | [209]          |
| 2022 | 10 | 3  | F   | 09:08->16:00      | overflow                | 7 h     | [210]          |
| 2022 | 10 | 3  | C   | 09:40             | NE Crater failure+PDCs  | 1 h     | [210]          |
| 2022 | 10 | 3  | PDC | 09:40             | NE Crater failure+PDCs  | 1 h     | [210]          |
| 2022 | 10 | 4  | F   | 09:07->12:00      | overflow                | 3 h     | [210]          |
| 2022 | 10 | 7  | F   | 22:15             | Overflow                | 3 h     | [211]          |
| 2022 | 10 | 9  | FF  | 07:22             | overflow                | 7 days  | [210, 212–213] |
| 2022 | 10 | 9  | C   | 07:22             | NE Crater failure+PDCs  |         | [210]          |
| 2022 | 10 | 9  | PDC | 07:22             | NE Crater failure+PDCs  |         | [210]          |
| 2022 | 11 | 16 | F   | 06:00->           | spattering+NEC overflow | 4 h     | [213–214]      |
| 2022 | 12 | 4  | C   | 14:28             | NE Crater failure+PDCs  |         | [215]          |
| 2022 | 12 | 4  | PDC | 14:28             | NE Crater failure+PDCs  |         | [215]          |
| 2022 | 12 | 4  | FF  | 14:10->           | Lava flow to the coast  | 4 days  | [215]          |
| 2023 | 1  | 17 | F   | 9:50->16:30       | overflow                | 6.5 h   | [216]          |
| 2023 | 1  | 24 | F   | 14:00->16:00      | overflow+PDC            | 2 h     | [217]          |
| 2023 | 1  | 30 | X   | 09:08             | Major explosion         |         | [218]          |
| 2023 | 2  | 16 | X   | 17:17             | Major explosion         |         | [219]          |
| 2023 | 2  | 27 | F   | 05:53+20:49       | 2 Overflows             | ~24 h   | [220]          |
| 2023 | 3  | 8  | F   | 05:20->           | overflow                | ~24 h-> | [221]          |
| 2023 | 3  | 9  | F   | 17:29->           | overflow                | 8 hours | [222]          |
| 2023 | 3  | 11 | F   | 02:05             | overflow                | 8 hours | [223]          |
| 2023 | 3  | 23 | FF  | 21:40->           | NEC overflow            | 3 days  | [224]          |
| 2023 | 3  | 25 | X   | 14:49             | Major explosion         |         | [224]          |
| 2023 | 4  | 7  | X   | 11:03+11:04+11:05 | Major explosion         | 2 min   | [224]          |

## References

1. Bertolaso, G.; De Bernardinis, B.; Cardaci, C.; Scalzo, A. Stromboli (2002–2003) Crisis Management and Risk Mitigation Actions. In *The Stromboli Volcano: An Integrated Study of the 2002–2003 Eruption*; Geophysical Monograph Series; American Geophysical Union: Washington, DC, USA, **2008**; Volume 182. <https://doi.org/10.1029/182GM30>.
2. Walker, G.P.L. Explosive volcanic eruptions—A new classification scheme. *Geol. Rundsch.* **1973**, *62*, 431–446.
3. Parfitt, E.A. A discussion of the mechanisms of explosive basaltic eruptions. *J. Volcanol. Geotherm. Res.* **2004**, *134*, 77–107. <https://doi.org/10.1016/j.jvolgeores.2004.01.002>.
4. Bombrun, M.; Harris, A.; Gurioli, L.; Battaglia, J.; Barra, V. Anatomy of a Strombolian eruption: Inferences from particle data recorded with thermal video. *J. Geophys. Res. Solid Earth* **2015**, *120*, 2367–2387. <https://doi.org/10.1002/2014JB011556>.
5. Vergnolle, S.; Métrich, N. An interpretative view of open-vent volcanoes. *Bull. Volcanol.* **2022**, *84*, 83. <https://doi.org/10.1007/s00445-022-01581-5>.
6. Benito, M.B.; Alvarado, G.E.; Marchamalo, M.; Rejas, J.G.; Murphy, P.; Franco, R.; Castro, D.; Garcia-Lanchares, C.; Sanchez, J. Temporal and spatial evolution of the 2021 eruption in the Tajogaite volcano (Cumbre Vieja rift zone, La Palma, Canary Islands) from geophysical and geodetic parameter analyses. *Nat. Hazards* **2023**, *118*, 2245–2284. <https://doi.org/10.1007/s11069-023-06090-y>.
7. Genzano, N.; Marchese, F.; Neri, M.; Pergola, N.; Tramutoli, V. Implementation of Robust Satellite Techniques for Volcanoes on ASTER Data under the Google Earth Engine Platform. *Appl. Sci.* **2021**, *11*, 4201. <https://doi.org/10.3390/app11094201>.
8. Schaefer, L.N.; Di Traglia, F.; Chaussard, E.; Lu, Z.; Nolesini, T.; Casagli, N. Monitoring volcano slope instability with Synthetic Aperture Radar: A review and new data from Pacaya (Guatemala) and Stromboli (Italy) volcanoes. *Earth-Sci. Rev.* **2019**, *192*, 236–257.
9. Dualeh, E.W.; Ebmeier, S.K.; Wright, T.J.; Albino, F.; Naismith, A.; Biggs, J.; Ordoñez, P.A.; Boogher, R.M.; Roca, A. Analyzing explosive volcanic deposits from satellite-based radar backscatter, Volcan de Fuego, 2018. *J. Geophys. Res. Solid Earth* **2021**, *126*, e2021JB022250. <https://doi.org/10.1029/2021JB022250>.
10. Romero, J.E.; Morgado, E.; Pisello, A.; Felix Boschetty, F.; Maurizio Petrelli, M.; Cáceres, F.; Ayaz Alam, M.; Margherita Polacci, M.; José, L.; Palma, J.; et al. Pre-eruptive Conditions of the 3 March 2015 Lava Fountain of Villarrica Volcano (Southern Andes). *Bull. Volcanol.* **2023**, *85*, 2. <https://doi.org/10.1007/s00445-022-01621-0>.
11. Calvari, S.; Cannavò, F.; Bonaccorso, A.; Spampinato, L.; Pellegrino, A.G. Paroxysmal Explosions, Lava Fountains and Ash Plumes at Etna Volcano: Eruptive Processes and Hazard Implications. *Frontiers in Earth Science* **2018**, *6*, 107. doi: 10.3389/feart.2018.00107.
12. Sbrana, A.; Cioni, R.; Marianelli, P.; Sulpizio, R.; Andronico, D.; Pasquini, G. Volcanic evolution of the Somma-Vesuvius Complex (Italy). *J. Maps* **2020**, *16*, 137–147. <https://doi.org/10.1080/17445647.2019.1706653>.
13. Ozerov, A.; Ispolatov, I.; Lees, J. Modeling Strombolian eruptions of Karymsky volcano, Kamchatka, Russia. *Jour. Volc. Geoth. Res.*, **2003**, *122*, 265–280.
14. Firth, C.W.; Turner, S.P.; Handley, H.K.; Turner, M.B.; Cronin, S.J.; Girard, G.; Smith, I.E.M. Rapid magmatic processes drive persistently active volcanism. *Lithos* **2021**, *380–381*, 105868. <https://doi.org/10.1016/j.lithos.2020.105868>.
15. Fenner, D.; Rümpler, G.; Laumann, P.; Srivastava, N. Amplitude and inter-event time statistics for the island volcanoes Stromboli, Mount Etna, Yasur, and Whakaari. *Front. Earth Sci.* **2023**, *11*, 1228103. <https://doi.org/10.3389/feart.2023.1228103>.
16. Peters, N.; Oppenheimer, C.; Kyle, P.; Kingsbury, N. Decadal persistence of cycles in lava lake motion at Erebus volcano, Antarctica. *Earth Planet. Sci. Lett.* **2014**, *395*, 1–12.
17. Iguchi, M.; Yakiwara, H.; Tameguri, T.; Hendrasto, M.; Hirabayashi, J. Mechanism of explosive eruption revealed by geophysical observations at the Sakurajima, Suwanosejima and Semeru volcanoes. *J. Volcanol. Geotherm. Res.* **2008**, *178*, 1–9.
18. Tsunematsu, K.; Ishii, K.; Yokoo, A. Transport of ballistic projectiles during the 2015 Aso Strombolian eruptions. *Earth Planets Space* **2019**, *71*, 49. <https://doi.org/10.1186/s40623-019-1029-3>.
19. Houghton, B.F.; Swanson, D.A.; Rausch, J.; Carey, R.J.; Fagents, S.A.; Orr, T.R. Pushing the Volcanic Explosivity Index to its limit and beyond: Constraints from exceptionally weak explosive eruptions at Kīlauea in 2008. *Geology* **2013**, *41*, 627–630. <https://doi.org/10.1130/G34146.1>.



20. Chouet, B.; Hamisevicz, N.; McGetchin, T.R. Photoballistics of volcanic jet activity at Stromboli, Italy. *J. Geophys. Res.* **1974**, *79*, 4961–4976.
21. Patrick, M. Dynamics of strombolian ash plumes from thermal (FLIR) video: Motion, morphology and air entrainment. *J. Geophys. Res.* **2007**, *112*, B06202. <https://doi.org/10.1029/2006JB004387>.
22. Patrick, M.R.; Harris, A.J.L.; Ripepe, M.; Dehn, J.; Rothery, D.A.; Calvari, S. Strombolian explosive styles and source conditions: Insights from thermal (FLIR) video. *Bull. Volcanol.* **2007**, *69*, 769–784. <https://doi.org/10.1007/s00445-006-0107-0>.
23. Barberi, F.; Rosi, M.; Sodi, A. Volcanic hazard assessment at Stromboli based on review of historical data. *Acta Vulcanol.* **1993**, *3*, 173–187.
24. Andronico, D.; Corsaro, R.A.; Cristaldi, A.; Polacci, M. Characterizing high energy explosive eruptions at Stromboli volcano using multidisciplinary data: An example from the 9 January 2005 explosion. *J. Volcanol. Geotherm. Res.* **2008**, *176*, 541–550.
25. Andronico, D.; Pistolesi, M. The November 2009 paroxysmal explosions at Stromboli. *J. Volcanol. Geotherm. Res.* **2010**, *196*, 120–125.
26. Coppola, D.; Laiolo, M.; Delle Donne, D.; Ripepe, M.; Cigolini, C. Hot-spot detection and characterization of strombolian activity from MODIS infrared data. *Int. J. Remote Sens.* **2014**, *35*, 3403–3426. <https://doi.org/10.1080/01431161.2014.903354>.
27. Houghton, B.F.; Taddeucci, J.; Andronico, D.; Gonnermann, H.M.; Pistolesi, M.; Patrick, M.R.; Orr, T.R.; Swanson, D.A.; Edmonds, M.; Gaudin, D.; et al. Stronger or longer: Discriminating between Hawaiian and Strombolian eruption styles. *Geology* **2016**, *44*, 163–166. <https://doi.org/10.1130/G37423.1>.
28. Giudicepietro, F.; Calvari, S.; Alparone, S.; Bianco, F.; Bonaccorso, A.; Bruno, V.; Caputo, T.; Cristaldi, A.; D’Auria, L.; De Cesare, W.; et al. Integration of Ground-Based Remote-Sensing and In Situ Multidisciplinary Monitoring Data to Analyze the Eruptive Activity of Stromboli Volcano in 2017–2018. *Remote Sens.* **2019**, *11*, 1813. <https://doi.org/10.3390/rs11151813>.
29. Giudicepietro, F.; Calvari, S.; D’Auria, L.; Di Traglia, F.; Layer, L.; Macedonio, G.; Caputo, T.; De Cesare, W.; Ganci, G.; Martini, M.; et al. Changes in the Eruptive Style of Stromboli Volcano before the 2019 Paroxysmal Phase Discovered through SOM Clustering of Seismo-Acoustic Features Compared with Camera Images and GBInSAR Data. *Remote Sens.* **2022**, *14*, 1287. <https://doi.org/10.3390/rs14051287>.
30. Giudicepietro, F.; Lopes, C.; Macedonio, G.; Alparone, S.; Bianco, F.; Calvari, S.; De Cesare, W.; Delle Donne, D.; Di Lieto, B.; Esposito, A.M.; et al. Geophysical precursors of the July–August 2019 paroxysmal eruptive phase and their implications for Stromboli volcano (Italy) monitoring. *Sci. Rep.* **2020**, *10*, 10296. <https://doi.org/10.1038/s41598-020-67220-1>.
31. Calvari, S.; Büttner, R.; Cristaldi, A.; Dellino, P.; Giudicepietro, F.; Orazi, M.; Peluso, R.; Spampinato, L.; Zimanowski, B.; Boschi, E. The 7 September 2008 Vulcanian explosion at Stromboli volcano: Multi-parametric characterisation of the event and quantification of the ejecta. *J. Geophys. Res.-Solid Earth* **2012**, *117*, B05201. <https://doi.org/10.1029/2011JB009048>.
32. Calvari, S.; Giudicepietro, F.; Di Traglia, F.; Bonaccorso, A.; Macedonio, G.; Casagli, N. Variable Magnitude and Intensity of Strombolian Explosions: Focus on the Eruptive Processes for a First Classification Scheme for Stromboli Volcano (Italy). *Remote Sens.* **2021**, *13*, 944. <https://doi.org/10.3390/rs13050944>.
33. Calvari, S.; Di Traglia, F.; Ganci, G.; Bruno, V.; Ciancitto, F.; Di Lieto, B.; Gambino, S.; Garcia, A.; Giudicepietro, F.; Inguaggiato, S.; et al. Multiparametric Study of an Eruptive Phase Comprising Unrest, Crater Failure, and Lava Flows: Stromboli volcano, 1 December 2020–30 June 2021. *Front. Earth Sci.* **2022**, *10*, 899635. <https://doi.org/10.3389/feart.2022.899635>.
34. Corradino, C.; Amato, E.; Torrisi, F.; Calvari, S.; Del Negro, C. Classifying Major Explosions and Paroxysms at Stromboli Volcano (Italy) from Space. *Remote Sens.* **2021**, *13*, 4080. <https://doi.org/10.3390/rs13204080>.
35. Amato, E.; Corradino, C.; Torrisi, F.; Del Negro, C. A Deep Convolutional Neural Network for Detecting Volcanic Thermal Anomalies from Satellite Images. *Remote Sens.* **2023**, *15*, 3718. <https://doi.org/10.3390/rs15153718>.
36. Gouhier, M.; Donnadieu, F. The geometry of Strombolian explosions: Insights from Doppler radar measurements. *Geophys. J. Int.* **2010**, *183*, 1376–1391. <https://doi.org/10.1111/j.1365-246X.2010.04829.x>.
37. Leduc, L.; Gurioli, L.; Harris, A.; Colò, L.; Rose-Koga, E.F. Types and mechanisms of strombolian explosions: Characterization of a gas-dominated explosion at Stromboli. *Bull. Volcanol.* **2015**, *77*, 8. <https://doi.org/10.1007/s00445-014-0888-5>.
38. Bertagnini, A.; Coltelli, M.; Landi, P.; Pompilio, M.; Rosi, M. Violent explosions yield new insights into dynamics of Stromboli volcano. *Eos Trans. Am. Geophys. Union* **1999**, *80*, 633–636. <https://doi.org/10.1029/99EO00415>.



39. Rosi, M.; Pistolesi, M.; Bertagnini, A.; Landi, P.; Pompilio, M.; Di Roberto, A. Stromboli volcano, Aeolian Islands (Italy): Present eruptive activity and hazards. *Geol. Soc. Lond. Mem.* **2013**, *37*, 473–490. <https://doi.org/10.1144/M37.14>.
40. Rittmann, A. Der Ausbruch des Stromboli am 11 September 1930. *Z Vulkanol.* **1931**, *14*, 47–77.
41. Ponte, G. Attività straordinaria dello Stromboli. *Ann. Geophys.* **1948**, *1*, 200–202.
42. Harris, A.J.L.; Ripepe, M.; Calvari, S.; Lodato, L.; Spampinato, L. The 5 April 2003 Explosion of Stromboli: Timing of Eruption Dynamics using Thermal Data. In *The Stromboli Volcano: An Integrated Study of the 2002–2003 Eruption*; American Geophysical Union Monograph Series; American Geophysical Union: Washington, DC, USA, **2008**; Volume 182, pp. 305–316. <https://doi.org/10.1029/182GM25>.
43. Métrich, N.; Bertagnini, A.; Pistolesi, M. Paroxysms at Stromboli Volcano (Italy): Source, Genesis and Dynamics. *Front. Earth Sci.* **2021**, *9*, 593339. <https://doi.org/10.3389/feart.2021.593339>.
44. Calvari, S.; Spampinato, L.; Lodato, L.; Harris, A.J.L.; Patrick, M.R.; Dehn, J.; Burton, M.R.; Andronico, D. Chronology and complex volcanic processes during the 2002–2003 flank eruption at Stromboli volcano (Italy) reconstructed from direct observations and surveys with a handheld thermal camera. *J. Geophys. Res.* **2005**, *110*, B02201. <https://doi.org/10.1029/2004JB003129>.
45. Calvari, S.; Di Traglia, F.; Ganci, G.; Giudicepietro, F.; Macedonio, G.; Cappello, A.; Nolesini, T.; Pecora, E.; Bilotta, G.; Centorrino, V.; et al. Overflows and Pyroclastic Density Currents in March–April 2020 at Stromboli Volcano Detected by Remote Sensing and Seismic Monitoring data. *Remote Sens.* **2020**, *12*, 3010. <https://doi.org/10.3390/rs12183010>.
46. Pistolesi, M.; Rosi, M.; Pioli, L.; Renzulli, A.; Bertagnini, A.; Andronico, D. The paroxysmal explosion and its deposits. In *The Stromboli Volcano: An Integrated Study of the 2002–2003 Eruption*; Geophysical Monograph Series; AGU: Washington, DC, USA, **2008**; Volume 182, pp. 317–329. <https://doi.org/10.1029/182GM26>.
47. Pistolesi, M.; Delle Donne, D.; Pioli, L.; Ripepe, M. The 15 March 2007 explosive crisis at Stromboli volcano, Italy: Assessing physical parameters through a multidisciplinary approach. *J. Geophys. Res. Atmos.* **2011**, *116*, B12206. <https://doi.org/10.1029/2011JB008527>.
48. Bonaccorso, A.; Calvari, S.; Linde, A.; Sacks, S.; Boschi, E. Dynamics of the shallow plumbing system investigated from borehole strainmeters and cameras during the 15 March 2007 Vulcanian paroxysm at Stromboli volcano. *Earth Planet. Sci. Lett.* **2012**, *357–358*, 249–256. <https://doi.org/10.1016/j.epsl.2012.09.009>.
49. Di Lieto, B.; Romano, P.; Scarpa, R.; Linde, A.T. Strain signals before and during paroxysmal activity at Stromboli volcano, Italy. *Geophys. Res. Lett.* **2020**, *47*, e2020GL088521. <https://doi.org/10.1029/2020GL088521>.
50. Giordano, G.; De Astis, G. The summer 2019 basaltic Vulcanian eruptions (paroxysms) of Stromboli. *Bull. Volcanol.* **2021**, *83*, 1. <https://doi.org/10.1007/s00445-020-01423-2>.
51. Voloschina, M.; Métrich, N.; Bertagnini, A.; Marianelli, P.; Aiuppa, A.; Ripepe, M.; Pistolesi, M. Explosive eruptions at Stromboli volcano (Italy): A comprehensive geochemical view on magma sources and intensity range. *Bull. Volcanol.* **2023**, *85*, 34. <https://doi.org/10.1007/s00445-023-01647-y>.
52. Aiuppa, A.; Bitetto, M.; Delle Donne, D.; La Monica, F.P.; Tamburello, G.; Coppola, D.; Della Schiava, M.; Innocenti, L.; Lacanna, G.; Laiolo, M.; et al. Volcanic CO<sub>2</sub> tracks the incubation period of basaltic paroxysms. *Sci. Adv.* **2021**, *7*, eabh0191.
53. Di Traglia, F.; Calvari, S.; D’Auria, L.; Nolesini, T.; Bonaccorso, A.; Fornaciai, A.; Esposito, A.; Cristaldi, A.; Favalli, M.; Casagli, N. The 2014 effusive eruption at Stromboli: New insights from in-situ and remote sensing measurements. *Remote Sens.* **2018**, *10*, 2035. <https://doi.org/10.3390/rs10122035>.
54. Nappi, G. Recent activity of Stromboli. *Nature* **1976**, *261*, 119–120.
55. Capaldi, G.; Guerra, I.; Lo Bascio, A.; Luongo, G.; Pece, R.; Rapolla, A.; Scarpa, R.; Del Pezzo, E.; Martini, M.; Ghiara, M.R.; et al. Stromboli and its 1975 Eruption. *Bull. Volcanol.* **1978**, *41*, 259–285.
56. De Fino, M.; La Volpe, L.; Falsaperla, S.; Frazzetta, G.; Neri, G.; Francalanci, L.; Rosi, M.; Sbrana, A. The Stromboli eruption of December 6, 1985–April 25, 1986: Volcanological, petrological and seismological data. *Rend. Soc. It. Min. Petr.* **1988**, *43*, 1021–1038.
57. Calvari, S.; Lodato, L.; Steffke, A.; Cristaldi, A.; Harris, A.J.L.; Spampinato, L.; Boschi, E. The 2007 Stromboli flank eruption: Chronology of the events, and effusion rate measurements from thermal images and satellite data. *J. Geophys. Res. Solid Earth* **2010**, *115*, B04201. <https://doi.org/10.1029/2009JB006478>.
58. Marsella, M.; Baldi, P.; Coltelli, M.; Fabris, M. The morphological evolution of the Sciara del Fuoco since 1868: Reconstructing the effusive activity at Stromboli volcano. *Bull. Volcanol.* **2012**, *74*, 231–248. <https://doi.org/10.1007/s00445-011-0516-6>.

59. Casalbore, D.; Di Traglia, F.; Bosman, A.; Romagnoli, C.; Casagli, N.; Chiocci, F.L. Submarine and Subaerial Morphological Changes Associated with the 2014 Eruption at Stromboli Island. *Remote Sens.* **2021**, *13*, 2043. <https://doi.org/10.3390/rs13112043>.
60. Falsaperla, S.; Maiolino, V.; Spampinato, S.; Jaquet, O.; Neri, M. Sliding episodes during the 2002–2003 Stromboli lava effusion: Insights from seismic, volcanic, and statistical data analysis. *Geochem. Geophys. Geosystems* **2008**, *9*, Q04022. <https://doi.org/10.1029/2007GC001859>.
61. Salvatici, T.; Di Roberto, A.; Di Traglia, F.; Bisson, M.; Morelli, S.; Fidolini, F.; Bertagnini, A.; Pompilio, M.; Hungr, O.; Casagli, N. From hot rocks to glowing avalanches: Numerical modelling of gravity-induced pyroclastic density currents and hazard maps at the Stromboli Volcano (Italy). *Geomorphology* **2016**, *273*, 93–106.
62. Turchi, A.; Di Traglia, F.; Luti, T.; Olori, D.; Zetti, I.; Fanti, R. Environmental aftermath of the 2019 Stromboli eruption. *Remote Sens.* **2020**, *12*, 994.
63. Calvari, S.; Intrieri, E.; Di Traglia, F.; Bonaccorso, A.; Casagli, N.; Cristaldi, A. Monitoring crater-wall collapse at active volcanoes: A study of the 12 January 2013 event at Stromboli. *Bull. Volcanol.* **2016**, *78*, 39. <https://doi.org/10.1007/s00445-016-1033-4>.
64. Maramai, A.; Graziani, L.; Tinti, S. Tsunamis in the Aeolian Islands (southern Italy): A review. *Mar. Geol.* **2005**, *215*, 11–21.
65. Tinti, S.; Maramai, A.; Armigliato, A.; Graziani, L.; Manucci, A.; Pagnoni, G.; Zaniboni, F. Observations of physical effects from tsunamis of December 30, 2002 at Stromboli volcano, Southern Italy. *Bull. Volcanol.* **2006**, *68*, 450–461. <https://doi.org/10.1007/s00445-005-0021-x>.
66. Fornaciai, A.; Favalli, M.; Nannipieri, L. Numerical simulations of the tsunamis generated by the Sciara del Fuoco landslides (Stromboli Islands, Italy). *Sci. Rep.* **2019**, *9*, 18542. <https://doi.org/10.1038/s41598-019-54949-7>.
67. Martini, M.; Giudicepietro, F.; D'Auria, L.; Esposito, A.M.; Caputo, T.; Curciotti, R.; De Cesare, W.; Orazi, M.; Scarpato, G.; Caputo, A.; et al. Seismological monitoring of the February 2007 effusive eruption of the Stromboli volcano. *Ann. Geophys.* **2007**, *50*, 775–788. <https://doi.org/10.4401/ag-3056>.
68. Tioukov, V.; Giudicepietro, F.; Macedonio, G.; Calvari, S.; Di Traglia, F.; Fornaciai, A.; Favalli, M. Structure of the Shallow Supply System at Stromboli Volcano, Italy, through Integration of Muography, Digital Elevation Models, Seismicity, and Ground Deformation Data. In: *Exploring Earth's Subsurface with Elementary Particles*; Olah, L., Tanaka, H.K.M., Varga, D., Eds.; Wiley: Hoboken, NJ, USA, 2022; Volume 270, pp. 75–91. <https://doi.org/10.1002/9781119722748.ch6>.
69. Di Traglia, F.; Intrieri, E.; Nolesini, T.; Bardi, F.; Del Ventisette, C.; Ferrigno, F.; Frangioni, S.; Frodella, W.; Gigli, G.; Lotti, A.; et al. The ground-based InSAR monitoring system at Stromboli volcano: Linking changes in displacement rate and intensity of persistent volcanic activity. *Bull. Volcanol.* **2014**, *76*, 786. <https://doi.org/10.1007/s00445-013-0786-2>.
70. Di Traglia, F.; Del Ventisette, C.; Rosi, M.; Mugnai F.; Intrieri, E.; Moretti, S.; Casagli, N. Ground-based InSAR reveals conduit pressurization pulses at Stromboli volcano. *Terra Nova* **2013**, *25*, 192–198. doi: 10.1111/ter.12020
71. Bevilacqua, A.; Bertagnini, A.; Pompilio, M.; Landi, P.; Del Carlo, P.; Di Roberto, A.; Piccione, C.; Neri, A. *Historical Catalog of Major Explosions and Paroxysms at Stromboli (Italy)*, 1st ed.; Istituto Nazionale di Geofisica e Vulcanologia (INGV): Roma, Italy, **2020**. <https://doi.org/10.13127/STROMBOLI/STRCATALOG>.
72. Bevilacqua, A.; Bertagnini, A.; Pompilio, M.; Landi, P.; Del Carlo, P.; Di Roberto, A.; Aspinall, W.; Neri, A. Major explosions and paroxysms at Stromboli (Italy): A new historical catalog and temporal models of occurrence with uncertainty quantification. *Sci. Rep.* **2020**, *10*, 17357. <https://doi.org/10.1038/s41598020-74301-8>.
73. Métrich, N.; Bertagnini, A.; Landi, P.; Rosi, M. Crystallization Driven by Decompression and Water Loss at Stromboli Volcano (Aeolian Islands, Italy). *J. Pet.* **2001**, *42*, 1471–1490.
74. Métrich, N.; Bertagnini, A.; Landi, P.; Rosi, M.; Balhadj, O. Triggering mechanism at the origin of paroxysms at Stromboli (Aeolian Archipelago, Italy): The 5 April 2003 eruption. *Geophys. Res. Lett.* **2005**, *32*, L10305. <https://doi.org/10.1029/2004GL022257>.
75. Rosi, M.; Bertagnini, A.; Landi, P. Onset of the persistent activity at Stromboli Volcano (Italy). *Bull. Volcanol.* **2000**, *62*, 294–300. <https://doi.org/10.1007/s004450000098>.
76. Lautze, N.; Houghton, B.F. Linking variable explosion style and magma textures during 2002 at Stromboli volcano, Italy. *Bull. Volcanol.* **2007**, *69*, 445–460. <https://doi.org/10.1007/s00445-006-0086-1>.
77. Abruzzese, D. Attività dello Stromboli dal 1934 al 1936. *Bull. Volcanol.* **1937**, *11*, 205–210.
78. Abruzzese, D. Attività dello Stromboli dal 1937 al giugno 1939. *Bull. Volcanol.* **1940**, *7*, 57–66.

79. Lo Giudice, E.; Rittmann, A. *BGVN (Global Volcanism Program, Smithsonian Institution)*; Smithsonian Institution: Washington, DC, USA, 6 May **1971**; CSLP 34-71, card 1196.
80. Nappi, G. Sull'attività recente dello Stromboli (ottobre 1972–dicembre 1974). *Boll. Della Soc. Geol. Ital.* **1975**, *94*, 465–478.
81. Falsaperla, S.; Montalto, A.; Spampinato, S. Analysis of seismic data concerning explosive sequences on Stromboli volcano in 1989. *Gruppo Naz. Per La Vulcanol. Boll.* **1989**, *1*, 249–258.
82. Falsaperla, S.; Cardaci, C. Seismic activity at Stromboli. *Acta Vulcanol.* **1994**, *6*, 56–58.
83. Renzulli, A.; Nappi, G.; Cardaci, C.; Falsaperla, S. Annual Report of the World Volcanic Eruptions in 1992. *Bull. Volcan. Erupt.* **1995**, *32*, 7–10.
84. Falsaperla, S.; Spampinato, S. Seismic insight into explosive paroxysms at Stromboli volcano, Italy. *J. Volcanol. Geotherm. Res.* **2003**, *125*, 137–150.
85. Jaquet, O.; Carniel, R. Multivariate stochastic modelling: Towards forecasts of paroxysmal phases at Stromboli. *J. Volcanol. Geotherm. Res.* **2003**, *128*, 261–271.
86. Langer, H.; Falsaperla, S. Long-term observation of volcanic tremor on Stromboli volcano (Italy): A synopsis. *Pure Appl. Geophys.* **1996**, *147*, 1198–1223.
87. Bonaccorso, A.; Calvari, S.; Garfi, G.; Lodato, L.; Patané, D. December 2002 flank failure and tsunami at Stromboli volcano inferred by volcanological and geophysical observations. *Geophys. Res. Lett.* **2003**, *30*, 1941–1944. <https://doi.org/10.1029/2003GL017702>.
88. Bertolaso, G.; Bonaccorso, A.; Boschi, E. Scientific Community and Civil Protection Synergy during the Stromboli 2002–2003 Eruption. In *The Stromboli Volcano: An Integrated Study of the 2002–2003 Eruption*; Geophysical Monograph Series; American Geophysical Union: Washington, DC, USA, **2008**; Volume 182. <https://doi.org/10.1029/182GM31>.
89. Barberi, F.; Civetta, L.; Rosi, M.; Scandone, R. Chronology of the 2007 eruption of Stromboli and the activity of the Scientific Synthesis Group. *J. Volcanol. Geotherm. Res.* **2009**, *182*, 123–130.
90. Casagli, N.; Intrieri, E.; Carlà, T.; Di Traglia, F.; Frodella, W.; Gigli, G.; Lombardi, L.; Nocentini, M.; Raspini, F.; Tofani, V. Monitoring and Early Warning Systems: Applications and Perspectives. In *Understanding and Reducing Landslide Disaster Risk*; ICL Contribution to Landslide Disaster Risk Reduction; Casagli, N., Tofani, V., Sassa, K., Bobrowsky, P.T., Takara, K., Eds.; Springer: Berlin/Heidelberg, Germany, **2021**. [https://doi.org/10.1007/978-3-030-60311-3\\_1](https://doi.org/10.1007/978-3-030-60311-3_1).
91. Calvari, S.; Bonaccorso, A.; Madonia, P.; Neri, M.; Liuzzo, M.; Salerno, G.G.; Behncke, B.; Caltabiano, T.; Cristaldi, A.; Giuffrida, G.; et al. Major eruptive style changes induced by structural modifications of a shallow conduit system: The 2007–2012 Stromboli case. *Bull. Volcanol.* **2014**, *76*, 841. <https://doi.org/10.1007/s00445-014-0841-7>.
92. Di Traglia, F.; Nolesini, T.; Ciampalini, A.; Solari, L.; Frodella, W.; Bellotti, F.; Fumagalli, A.; De Rosa, G.; Casagli, N. Tracking morphological changes and slope instability using spaceborne and ground-based SAR data. *Geomorphology* **2018**, *300*, 95–112.
93. Di Traglia, F.; Calvari, S.; Borselli, L.; Cassanego, L.; Giudicepietro, F.; Macedonio, G.; Nolesini, T.; Casagli, N. Assessing flank instability of Stromboli volcano (Italy) by the reappraising of the 30 December 2002 tsunamigenic landslides. *Landslides* **2023**, *20*, 1363–1380. <https://doi.org/10.1007/s10346-023-02043-5>.
94. Andronico, D.; Del Bello, E.; D'Oriano, C.; Landi, P.; Pardini, F.; Scarlato, P.; de' Michieli Vitturi, M.; Taddeucci, J.; Cristaldi, A.; Ciancitto, F.; et al. Uncovering the eruptive patterns of the 2019 double paroxysm eruption crisis of Stromboli volcano. *Nat. Commun.* **2021**, *12*, 4213. <https://doi.org/10.1038/s41467-021-24420-1>.
95. Calvari, S.; Nunnari, G. Etna Output Rate during the Last Decade (2011–2022): Insights for Hazard Assessment. *Remote Sens.* **2022**, *14*, 6183.
96. Watt, S.F.L.; Mather, T.A.; Pyle, D.M. Vulcanian explosion cycles: Patterns and predictability. *Geology* **2007**, *35*, 839–842. <https://doi.org/10.1130/G23562A.1>.
97. Connor, C.B.; Sparks, R.S.J.; Mason, R.M.; Bonadonna, C.; Young, S.R. Exploring links between physical and probabilistic models of volcanic eruptions: The Soufrière Hills Volcano, Montserrat. *Geophys. Res. Lett.* **2003**, *30*, 1701. <https://doi.org/10.1029/2003GL017384>.
98. Bak, P. *How Nature Works: The Science of Self-Organized Criticality*. **1996**, Copernicus: New York, NY, USA,.
99. Corral, A.; Gonzales, A. Power Law Size Distributions in Geoscience Revisited. *Earth Space Sci.* **2019**, *6*, 673–697.
100. Clauset, A.; Cosma, R.S.; Newman, M.E.J. Power-Law Distributions in Empirical Data. *SIAM Rev.* **2009**, *5*, 661–703.
101. Fornaciai, A.; Favalli, M.; Nannipieri, L. Reconstruction of the 2002 tsunami at Stromboli using the non-hydrostatic WAVE model (NHWAVE). In: Marotta, E.; D'Auria, L.; Zaniboni, F.; Nave, R. (Eds.) *Volcanic Island: From Hazard Assessment to Risk Mitigation*. *Geol. Soc. Lond. Spec. Publ.* **2021**, *519*, SP519-2020. <https://doi.org/10.1144/SP519-2020-162>.

102. Romagnoli, C.; Casalbore, D.; Bortoluzzi, G.; Bosman, A.; Chiocci, F.L.; D'Oriano, F.; Gamberi, F.; Ligi, M.; Marani, M. Bathy-morphological setting of the Aeolian Islands. *Geol. Soc. Lond. Mem.* **2013**, *37*, 27–36. <https://doi.org/10.1144/M37.4>.
103. Romagnoli, C.; Kokelaar, P.; Rossi, P.L.; Sodi, A. The submarine extension of the Sciara del Fuoco feature (Stromboli isl.): Morphologic characterization. *Acta Vulcanol.* **1993**, *3*, 91–98.
104. Marani, M.P.; Gamberi, F. Distribution and nature of submarine volcanic landforms in the Tyrrhenian Sea: The arc vs the backarc. *Mem. Descr. Carta Geol. D'Italia* **2004**, *44*, 109–126. In: *From Seafloor to Deep Mantle: Architecture of the Tyrrhenian Backarc Basin*; Marani, M.P., Gamberi, F., Bonatti, E., Eds.; Istituto Poligrafico dello Stato (Roma), APAT: Roma, Italy.
105. Civico, R.; Ricci, T.; Scarlato, P.; Andronico, D.; Cantarero, M.; Carr, B.B.; De Beni, E.; Del Bello, E.; Johnson, J.B.; Kueppers, U.; et al. Unoccupied Aircraft Systems (UASs) Reveal the Morphological Changes at Stromboli Volcano (Italy) before, between, and after the 3 July and 28 August 2019 Paroxysmal Eruptions. *Remote Sens.* **2021**, *13*, 2870. <https://doi.org/10.3390/rs13152870>.
106. Neri, M.; Mazzarini, F.; Tarquini, S.; Bisson, M.; Isola, I.; Behncke, B.; Pareschi, M.T. The changing face of Mount Etna's summit area documented with Lidar technology. *Geophys. Res. Lett.* **2008**, *35*, L09305. <https://doi.org/10.1029/2008GL033740>.
107. Bisson, M.; Spinetti, C.; Andronico, D.; Palaseanu-Lovejoy, M.; Buongiorno, M.F.; Alexandrov, O.; Cecere, T. Ten years of volcanic activity at Mt Etna: High resolution mapping and accurate quantification of the morphological changes by Pleiades and Lidar data. *Int. J. Appl. Earth Obs. Geoinf.* **2021**, *102*, 102369.
108. Ganci, G.; Cappello, A.; Neri, M. Data Fusion for Satellite- Derived Earth Surface: The 2021 Topographic Map of Etna Volcano. *Remote Sens.* **2023**, *15*, 198. <https://doi.org/10.3390/rs15010198>.
109. Wadge, G. The storage and release of magma on Mount Etna. *J. Volcanol. Geotherm. Res.* **1977**, *2*, 361–384.
110. Corsaro, R.A.; Pompilio, M. Dynamics of magma at Mount Etna. In *Mt. Etna Volcano Laboratory*; Geophysical Monograph Series; American Geophysical Union: Washington, DC, USA, **2004**; Volume 143, pp. 91–110.
111. Francalanci, L.; Avanzinelli, R.; Nardini, I.; Tiepolo, M.; Davidson, J.P.; Vannucci, R. Crystal recycling in the steady-state system of the active Stromboli volcano: A 2.5-ka story inferred from in situ Sr-isotope and trace element data. *Contrib. Miner. Pet.* **2012**, *163*, 109–131. <https://doi.org/10.1007/s00410-011-0661-0>.
112. Patané, D.; Aiuppa, A.; Aloisi, M.; Behncke, B.; Cannata, A.; Coltelli, M.; Di Grazia, G.; Gambino, S.; Gurrieri, S.; Marria, M.; et al. Insights into magma and fluid transfer at Mount Etna by a multiparametric approach: A model of the events leading to the 2011 eruptive cycle. *J. Geophys. Res. Solid Earth* **2013**, *118*, 3519–3539. <https://doi.org/10.1002/jgrb.50248>.
113. Patané, D.; Barberi, G.; De Gori, P.; Cocina, O.; Zuccarello, L.; Garcia-Yeguas, A.; Castellano, M.; D'Alessandro, A.; Sgroi, T. The shallow magma chamber of Stromboli Volcano (Italy). *Geophys. Res. Lett.* **2017**, *44*, 6589–6596. <https://doi.org/10.1002/2017GL073008>.
114. Revil, A.; Finizola, A.; Johnson, T.; Ricci, T.; Gresse, M.; Delcher, E.; et al. The thermal plumbing system of Stromboli volcano, Aeolian Islands (Italy) inferred from electrical conductivity and induced polarization tomography. *J. Geophys. Res. : Solid Earth* **2023**, *128*, e2023JB026475. <https://doi.org/10.1029/2023JB026475>.
115. Guest, J.E.; Duncan, A.M. Internal plumbing of Mount Etna. *Nature* **1981**, *290*, 584–586.
116. Branca, S.; Del Carlo, P. Types of eruptions of Etna volcano AD 1670–2003: Implications for short-term eruptive behaviour. *Bull. Volcanol.* **2005**, *67*, 732–742. <https://doi.org/10.1007/s00445-005-0412-z>.
117. Harris, A.J.L.; Steffke, A.; Calvari, S.; Spampinato, L. Thirty years of satellite-derived lava discharge rates at Etna: Implications for steady volumetric output. *J. Geophys. Res.* **2011**, *116*, B08204. <https://doi.org/10.1029/2011JB008237>.
118. Harris, A.J.L.; Steffke, A.; Calvari, S.; Spampinato, L. Thirty years of satellite-derived lava discharge rates at Etna: Implications for steady volumetric output. *J. Geophys. Res.* **2011**, *116*, B08204; Erratum in *J. Geophys. Res.* **2012**, *117*, B08207. <https://doi.org/10.1029/2012JB009431>.
119. Harris, A.J.L.; Stevenson, D.S. Magma budgets and steady-state activity of Vulcano and Stromboli. *Geophys. Res. Lett.* **1997**, *24*, 1043–1046.
120. Washington, H.S. Persistence of vents at Stromboli and its bearing on volcanic mechanism. *Geol. Soc. Am. Bull.* **1917**, *28*, 249–278. <https://doi.org/10.1130/gsab-28-249>.
121. Cavallaro, C. Le attività dello Stromboli nel triennio 1957-59 e le variazioni morfologiche da esse determinate. In *Proceedings of the Atti del XX Congresso Geografico Italiano (1967)*, Rome, Italy, (23 March–3 April 1967), **1970**; pp. 229–243.
122. Harris, A.; Ripepe, M. Temperature and dynamics of degassing at Stromboli. *J. Geophys. Res.* **2007**, *112*, B03205. <https://doi.org/10.1029/2006JB004393>.



123. Allard, P.; Aiuppa, A.; Loyer, H.; Carrot, F.; Gaudry, A.; Pinte, G.; Michel, A.; Dongarrà, G. Acid gas and metal emission rates during long-lived basalt degassing at Stromboli volcano. *Geophys. Res. Lett.* **2000**, *27*, 1207–1210.
124. Pompilio, M.; Bertagnini, A.; Métrich, N. Geochemical heterogeneities and dynamics of magmas within the plumbing system of a persistently active volcano: Evidence from Stromboli. *Bull. Volcanol.* **2012**, *74*, 881–894. <https://doi.org/10.1007/s00445-011-0571-z>.
125. Re, G.; Pompilio, M.; Del Carlo, P.; Di Roberto, A. Physical and morphological characterization of the 19 May 2021 ash cloud deposit at Stromboli (Italy). *Sci. Rep.* **2022**, *12*, 10777. <https://doi.org/10.1038/s41598-022-14908-1>.
126. Gambino, S.; Scaltrito, A. Volcanic-tectonic seismicity at Stromboli (2005–2016). *J. Volcanol. Geotherm. Res.* **2018**, *350*, 1–6. <https://doi.org/10.1016/j.jvolgeores.2017.11.008>.
127. Bonaccorso, A. Evidence of a dike-sheet intrusion at Stromboli volcano inferred through continuous tilt. *Geophys. Res. Lett.* **1998**, *25*, 4225–4228.
128. Abbruzzese, D. Attività dello Stromboli dal 1930 al 1934. *Boll. Soc. Sism. It.* **1935**, *33*, 118–125.
129. Abbruzzese, D. Attività dello Stromboli dal 1934 al 1936. *Boll. Volcanol.* **1937**, *2*, 70–76.
130. Abbruzzese, D. Attività dello Stromboli dal 1937 al giugno del 1939. *Boll. Soc. Sism. It.* **1940**, *7*, 57–66.
131. Burton, M.; Calvari, S.; Spampinato, L.; Lodato, L.; Pino, N.A.; Marchetti, E.; Mure, F. Volcanic and seismic activity at Stromboli preceding the 2002–03 eruption. In *The Stromboli Volcano: An Integrated Study of the 2002–2003 Eruption*; American Geophysical Union Monograph Series; American Geophysical Union: Washington, DC, USA, 2008; Volume 182, pp. 93–104, ISBN 978-0-87590-447-0. <https://doi.org/10.1029/182GM09>.
132. Calvari, S. (1993) Bulletin of the Global Volcanism Network; May 1993, vol. 18, n. 05. Global Volcanism Program, 1993. Report on Stromboli (Italy) (Venzke, E., ed.). Bulletin of the Global Volcanism Network, 18:5. Smithsonian Institution. <https://doi.org/10.5479/si.GVP.BGVN199305-211040>
133. Calvari, S. (1993) Bulletin of the Global Volcanism Network vol. 18, n. 10. Global Volcanism Program, 1993. Report on Stromboli (Italy) (Venzke, E., ed.). Bulletin of the Global Volcanism Network, 18:5. Smithsonian Institution. <https://doi.org/10.5479/si.GVP.BGVN199305-211040>
134. Calvari, S. 2011 INGV Internal Report Prot. Int. N. UFVG2011/30; INGV: Rome, Italy, 2011.
135. Cavallaro, C. Un ciclo effusivo dello Stromboli (1–14 gennaio 1956; 16 gennaio–16 marzo 1956). *Riv. Stromboli* **1957**, *6*, 33–39.
136. Cavallaro, C. L'attività dello Stromboli dal 1940 al 1953. *Boll. Accad. Gioenia Sci. Nat. Catania* **1957**, *3*, 525–532.
137. Cavallaro, C. L'attività effusiva dello Stromboli del 22 marzo 1955. *Riv. Stromboli* **1957**, *5*, 15–17.
138. Cavallaro, C. L'attività dello Stromboli dall'aprile 1954 al 31 dicembre 1956. *Boll. Accad. Gioenia Sci. Nat. Catania IV(IV Fasc. 1)* **1957**, 103–118.
139. Cucuzza Silvestri, S. La recente attività dello Stromboli (febbraio-marzo 1954). *Boll. Accad. Gioenia Sci. Nat. Catania 3(IV)* **1955**, 26–31.
140. De Fiore, O. I fenomeni eruttivi avvenuti allo Stromboli dal 1914 al 1916. *Boll. Soc. Sism. It.* **1923**, *24*, 9–66.
141. Falsaperla, S.; Cardaci, C. Main Features of seismic activity at Stromboli. *Acta Vulcanol.* **1998**, *10*, 136–140.
142. Falsaperla S., Velardita L. Bulletin of the Global Volcanism Network; January 1993, vol. 18, n. 1. Global Volcanism Program, 1993. Report on Stromboli (Italy) (Venzke, E., ed.). Bulletin of the Global Volcanism Network, 18:1. Smithsonian Institution. <https://doi.org/10.5479/si.GVP.BGVN199305-211040>
143. Gasparini, P.; Lirer, L.; Luongo, G. Caratteristiche petrochimiche e fisiche della lava emessa dallo Stromboli nell'aprile del 1967. *Ann. Dell'osservatorio Vesuv. Sesta Ser.* **1996**, *8*, 37–52.
144. Gurioli, L.; Harris, A.J.L.; Colò, L.; Bernard, J.; Favalli, M.; Ripepe, M.; Andronico, D. Classification, landing distribution, and associated flight parameters for a bomb field emplaced during a single major explosion at Stromboli, Italy. *Geology* **2013**, *41*, 559–562. <https://doi.org/10.1130/G33967.1>.
145. Landi, P.; Métrich, N.; Bertagnini, A.; Rosi, M. Recycling and “re-hydration” of degassed magma inducing transient dissolution/crystallization events at Stromboli (Italy). *J. Volcanol. Geotherm. Res.* **2008**, *174*, 325–336.
146. Nappi, G.; Renzulli, A.; Falsaperla, S. Annual Report of the World Volcanic Eruptions. *Bull. Volcan. Erupt.* **1991**, 1–2.
147. Ponte, G. La catastrofica esplosione dello Stromboli. *Atti Reale Accad. Lincei* **1919**, *28*, 5, 89–94.
148. Rosi, M.; Sbrana, A. *Bulletin of Volcanic Eruptions No. 25*; Publisher: City, Country, **1988**
149. Simkin, T.; Siebert, L.; McClell, L.; Bridge, D.; Newhall, C.; Latter, J.H. *Volcanoes of the World*; Hutchinson Ross Publ. Co.: Stroudsburg, PA, USA; Washington, DC, USA, **1981**; p. 233.

150. Calvari, S., Spampinato, L., Lodato, L., The 5 April 2003 vulcanian paroxysmal explosion at Stromboli volcano (Italy) from field observations and thermal data. *Jour. Volcanol. Geoth. Res.* **2006**, 149, 160-175. doi:10.1016/j.jvolgeores.2005.06.006.
151. Calvari, S. unpublished data (time, duration and craters).
152. INGV, Comunicato del 18/03/2003 - Aggiornamento alle ore 15:00. <http://sowebapp.ct.ingv.it/oldweb/Stromboli2002/Main.htm>, accessed 20 August 2023.
153. INGV Comunicato del 03/04/2003 - Aggiornamento alle ore 13:00. <http://sowebapp.ct.ingv.it/oldweb/Stromboli2002/Main.htm>, accessed 20 August 2023.
154. INGV Comunicato del 11/04/2003 - Aggiornamento alle ore 13:00. <http://sowebapp.ct.ingv.it/oldweb/Stromboli2002/Main.htm>, accessed 20 August 2023.
155. Rapporto UFVG sull'evento esplosivo dello Stromboli del 23/06/2005. Calvari S., unpublished data.
156. CFC Report 2006. Dipartimento della Protezione Civile Italiana, restricted website, accessed 20 August 2007.
157. Comunicato INGV del 9/8/2008, aggiornamento alle 9:15 ora locale. <http://sowebapp.ct.ingv.it/oldweb/Stromboli2002/Main.htm>, accessed 20 August 2023.
158. Bollettino Università di Firenze del 1 gennaio 2009. <http://lgs.geo.unifi.it/bulletins/>, accessed 20 August 2009.
159. Comunicato INGV aggiornamento attività eruttiva di Stromboli del 05/01/2010. <http://sowebapp.ct.ingv.it/oldweb/Stromboli2002/Main.htm>, accessed 20 August 2023.
160. Comunicato INGV settimanale sul monitoraggio vulcanico, geochimico, delle deformazioni del suolo e sismico del vulcano Stromboli del 19/01/2010. <http://sowebapp.ct.ingv.it/oldweb/Stromboli2002/Main.htm>, accessed 20 August 2023.
161. Comunicato INGV del 12/03/2010 (aggiornamento alle 10:00 ora locale). <http://sowebapp.ct.ingv.it/oldweb/Stromboli2002/Main.htm>, accessed 20 August 2023.
162. Comunicato INGV del 12/07/2010 (aggiornamento alle 09:10 ora locale). <http://sowebapp.ct.ingv.it/oldweb/Stromboli2002/Main.htm>, accessed 20 August 2023.
163. Bollettino settimanale INGV del 2/11/2010. <http://sowebapp.ct.ingv.it/oldweb/Stromboli2002/Main.htm>, accessed 20 August 2023.
164. Bollettino settimanale INGV del 14/12/2010. <http://sowebapp.ct.ingv.it/oldweb/Stromboli2002/Main.htm>, accessed 20 August 2023.
165. Bollettino settimanale INGV Stromboli del 02/08/2011. <http://sowebapp.ct.ingv.it/oldweb/Stromboli2002/Main.htm>, accessed 20 August 2023.
166. INGV Internal Report Prot. Int. N. UFVG2011/30. Calvari S., unpublished data.
167. Bollettino settimanale INGV Stromboli Rep n.08/2012. <http://sowebapp.ct.ingv.it/oldweb/Stromboli2002/Main.htm>, accessed 20 August 2023.
168. Bollettino settimanale INGV Stromboli del 15/01/2013. <http://sowebapp.ct.ingv.it/oldweb/Stromboli2002/Main.htm>, accessed 20 August 2023.
169. Bollettino settimanale INGV Stromboli Rep. N. 7/2013 del 12/02/2013. <http://sowebapp.ct.ingv.it/oldweb/Stromboli2002/Main.htm>, accessed 20 August 2023.
170. Bollettino settimanale INGV Stromboli Rep. N. 16/2013 del 16/04/2013. <http://sowebapp.ct.ingv.it/oldweb/Stromboli2002/Main.htm>, accessed 20 August 2023.
171. Bollettino settimanale INGV Stromboli Rep. N. 17/2013 del 23/04/2013. <http://sowebapp.ct.ingv.it/oldweb/Stromboli2002/Main.htm>, accessed 20 August 2023.
172. Bollettino settimanale INGV Stromboli Rep. N. 18/2013 del 30/04/2013. <http://sowebapp.ct.ingv.it/oldweb/Stromboli2002/Main.htm>, accessed 20 August 2023.
173. Bollettino settimanale INGV Stromboli Rep. N. 19/2013 del 07/05/2013. <http://sowebapp.ct.ingv.it/oldweb/Stromboli2002/Main.htm>, accessed 20 August 2023.
174. Bollettino settimanale INGV Stromboli Rep. N. 20/2013 del 14/05/2013. <http://sowebapp.ct.ingv.it/oldweb/Stromboli2002/Main.htm>, accessed 20 August 2023.
175. Comunicato Stromboli INGV del 14/12/2013 19:34 (18:34 UTC). <http://sowebapp.ct.ingv.it/oldweb/Stromboli2002/Main.htm>, accessed 20 August 2023.
176. Bollettino settimanale INGV Rep. N. 51/2013 Stromboli. <http://sowebapp.ct.ingv.it/oldweb/Stromboli2002/Main.htm>, accessed 20 August 2023.
177. Bollettino settimanale INGV Stromboli Rep. N. 26/2014 del 24/06/2014. <http://sowebapp.ct.ingv.it/oldweb/Stromboli2002/Main.htm>, accessed 20 August 2023.
178. Bollettino settimanale INGV Stromboli Rep. N. 27/2014 del 01/07/2014. <http://sowebapp.ct.ingv.it/oldweb/Stromboli2002/Main.htm>, accessed 20 August 2023.
179. Bollettino settimanale INGV Stromboli Rep. N. 28/2014 del 08/07/2014. <http://sowebapp.ct.ingv.it/oldweb/Stromboli2002/Main.htm>, accessed 20 August 2023.
180. Bollettino settimanale INGV Stromboli Rep. N. 29/2014 del 15/07/2014. <http://sowebapp.ct.ingv.it/oldweb/Stromboli2002/Main.htm>, accessed 20 August 2023.
181. Bollettino settimanale INGV Stromboli Rep. N. 30/2014 del 22/07/2014. <http://sowebapp.ct.ingv.it/oldweb/Stromboli2002/Main.htm>, accessed 20 August 2023.
182. Bollettino settimanale INGV Stromboli Rep. N. 46/2015. <http://sowebapp.ct.ingv.it/oldweb/Stromboli2002/Main.htm>, accessed 20 August 2023.
183. Bollettino settimanale INGV Stromboli Rep. N. 31/2017. <http://sowebapp.ct.ingv.it/oldweb/Stromboli2002/Main.htm>, accessed 20 August 2023.
184. Bollettino settimanale INGV Rep. N. 43/2017 Stromboli. <http://sowebapp.ct.ingv.it/oldweb/Stromboli2002/Main.htm>, accessed 20 August 2023.
185. Bollettino settimanale INGV Rep. N. 45/2017 Stromboli. <http://sowebapp.ct.ingv.it/oldweb/Stromboli2002/Main.htm>, accessed 20 August 2023.
186. Bollettino settimanale INGV Rep. N. 49/2017 Stromboli. <http://sowebapp.ct.ingv.it/oldweb/Stromboli2002/Main.htm>, accessed 20 August 2023.
187. Bollettino settimanale INGV Rep. N. 51/2017 Stromboli. <http://sowebapp.ct.ingv.it/oldweb/Stromboli2002/Main.htm>, accessed 20 August 2023.

188. Bollettino settimanale INGV Rep. N. 11/2018 Stromboli. <http://sowebapp.ct.ingv.it/oldweb/Stromboli2002/Main.htm>, accessed 20 August 2023.
189. Bollettino settimanale INGV Rep. N. 12/2018 Stromboli. <http://sowebapp.ct.ingv.it/oldweb/Stromboli2002/Main.htm>, accessed 20 August 2023.
190. Bollettino settimanale INGV Rep. N. 18/2018 Stromboli. <http://sowebapp.ct.ingv.it/oldweb/Stromboli2002/Main.htm>, accessed 20 August 2023.
191. Bollettino settimanale INGV Rep. N. 34/2018 Stromboli. <http://sowebapp.ct.ingv.it/oldweb/Stromboli2002/Main.htm>, accessed 20 August 2023.
192. Bollettino settimanale INGV Rep. N. 50/2018 Stromboli. <http://sowebapp.ct.ingv.it/oldweb/Stromboli2002/Main.htm>, accessed 20 August 2023.
193. Bollettino settimanale INGV Rep. N. 14/2020 Stromboli. <http://sowebapp.ct.ingv.it/oldweb/Stromboli2002/Main.htm>, accessed 20 August 2023.
194. Bollettino settimanale INGV Rep. N. 15/2020 Stromboli. <http://sowebapp.ct.ingv.it/oldweb/Stromboli2002/Main.htm>, accessed 20 August 2023.
195. Comunicato Stromboli INGV del 24/01/2021 18:19 (17:19 UTC). <http://sowebapp.ct.ingv.it/oldweb/Stromboli2002/Main.htm>, accessed 20 August 2023.
196. Comunicato Stromboli INGV del 14/07/2021 16:23 (14:23 UTC). <http://sowebapp.ct.ingv.it/oldweb/Stromboli2002/Main.htm>, accessed 20 August 2023.
197. Bollettino settimanale INGV Rep. N. 31/2021 Stromboli. <http://sowebapp.ct.ingv.it/oldweb/Stromboli2002/Main.htm>, accessed 20 August 2023.
198. Comunicato Stromboli INGV del 11/09/2021 21:51 (19:51 UTC). <http://sowebapp.ct.ingv.it/oldweb/Stromboli2002/Main.htm>, accessed 20 August 2023.
199. Comunicato Stromboli INGV del 06/10/2021 16:51 (14:51 UTC). <http://sowebapp.ct.ingv.it/oldweb/Stromboli2002/Main.htm>, accessed 20 August 2023.
200. Bollettino settimanale INGV Rep. N. 44/2021 Stromboli. <http://sowebapp.ct.ingv.it/oldweb/Stromboli2002/Main.htm>, accessed 20 August 2023.
201. Bollettino settimanale INGV Rep. N. 48/2021 Stromboli. <http://sowebapp.ct.ingv.it/oldweb/Stromboli2002/Main.htm>, accessed 20 August 2023.
202. Bollettino settimanale INGV Rep. N. 20/2022 Stromboli. <http://sowebapp.ct.ingv.it/oldweb/Stromboli2002/Main.htm>, accessed 20 August 2023.
203. Comunicato Stromboli INGV del 25/07/2022 16:57 (14:57 UTC). <http://sowebapp.ct.ingv.it/oldweb/Stromboli2002/Main.htm>, accessed 20 August 2023.
204. Comunicato Stromboli INGV del 06/06/2022 23:04 (21:04 UTC). <http://sowebapp.ct.ingv.it/oldweb/Stromboli2002/Main.htm>, accessed 20 August 2023.
205. Comunicato Stromboli INGV del 25/07/2022 05:00 (03:00 UTC). <http://sowebapp.ct.ingv.it/oldweb/Stromboli2002/Main.htm>, accessed 20 August 2023.
206. Bollettino settimanale INGV Rep. N. 31/2022 Stromboli. <http://sowebapp.ct.ingv.it/oldweb/Stromboli2002/Main.htm>, accessed 20 August 2023.
207. Comunicato Stromboli INGV del 27/07/2022 21:03 (19:03 UTC). <http://sowebapp.ct.ingv.it/oldweb/Stromboli2002/Main.htm>, accessed 20 August 2023.
208. Comunicato Stromboli INGV del 25/09/2022 06:19 (04:19 UTC). <http://sowebapp.ct.ingv.it/oldweb/Stromboli2002/Main.htm>, accessed 20 August 2023.
209. Bollettino settimanale INGV Rep. N. 40/2022 Stromboli. <http://sowebapp.ct.ingv.it/oldweb/Stromboli2002/Main.htm>, accessed 20 August 2023.
210. Bollettino settimanale INGV Rep. N. 41/2022 Stromboli. <http://sowebapp.ct.ingv.it/oldweb/Stromboli2002/Main.htm>, accessed 20 August 2023.
211. Comunicato Stromboli INGV del 08/10/2022 02:08 (00:08 UTC). <http://sowebapp.ct.ingv.it/oldweb/Stromboli2002/Main.htm>, accessed 20 August 2023.
212. Bollettino settimanale INGV Rep. N. 42/2022 Stromboli. <http://sowebapp.ct.ingv.it/oldweb/Stromboli2002/Main.htm>, accessed 20 August 2023.
213. Giudicepietro, F.; Calvari, S.; De Cesare, W.; Di Lieto, B.; Di Traglia, F.; Esposito, A.M.; Orazi, M.; Romano, P.; Tramelli, A.; Nolesini, T.; Casagli, N.; Calabria, P.; Macedonio, G. Seismic and thermal precursors of crater collapses and overflows at Stromboli volcano. *Scientific Reports* **2023**, *13*, 11115. <https://doi.org/10.1038/s41598-023-38205-7>.
214. Comunicato Stromboli INGV del 16/11/2022 08:14 (07:14 UTC). <http://sowebapp.ct.ingv.it/oldweb/Stromboli2002/Main.htm>, accessed 20 August 2023.
215. Comunicato Stromboli INGV del 04/12/2022 19:06 (18:06 UTC). <http://sowebapp.ct.ingv.it/oldweb/Stromboli2002/Main.htm>, accessed 20 August 2023.
216. Bollettino settimanale INGV Rep. N. 04/2023 Stromboli. <http://sowebapp.ct.ingv.it/oldweb/Stromboli2002/Main.htm>, accessed 20 August 2023.
217. Comunicato Stromboli INGV del 24/01/2023 16:57 (15:57 UTC). <http://sowebapp.ct.ingv.it/oldweb/Stromboli2002/Main.htm>, accessed 20 August 2023.
218. Comunicato Stromboli INGV del 30/01/2023 10:42 (09:42 UTC). <http://sowebapp.ct.ingv.it/oldweb/Stromboli2002/Main.htm>, accessed 20 August 2023.
219. Comunicato Stromboli INGV del 16/02/2023 18:46 (17:46 UTC). <http://sowebapp.ct.ingv.it/oldweb/Stromboli2002/Main.htm>, accessed 20 August 2023.
220. Comunicato Stromboli INGV del 27/02/2023 07:33 (06:33 UTC). <http://sowebapp.ct.ingv.it/oldweb/Stromboli2002/Main.htm>, accessed 20 August 2023.
221. Comunicato Stromboli INGV del 08/03/2023 08:27 (07:27 UTC). <http://sowebapp.ct.ingv.it/oldweb/Stromboli2002/Main.htm>, accessed 20 August 2023.
222. Comunicato Stromboli INGV del 10/03/2023 13:39 (12:39 UTC). <http://sowebapp.ct.ingv.it/oldweb/Stromboli2002/Main.htm>, accessed 20 August 2023.
223. Bollettino settimanale INGV Rep. N. 11/2023 Stromboli. <http://sowebapp.ct.ingv.it/oldweb/Stromboli2002/Main.htm>, accessed 20 August 2023.
224. Bollettino settimanale INGV Rep. N. 13/2023 Stromboli. <http://sowebapp.ct.ingv.it/oldweb/Stromboli2002/Main.htm>, accessed 20 August 2023.
